# Supplementary material
Source: PubMed Central journal article supplement (PMC5783669)

**Note to readers with disabilities:** *EHP* strives to ensure that all journal content is accessible to all readers. However, some figures and Supplemental Material published in *EHP* articles may not conform to [508 standards](#) due to the complexity of the information being presented. If you need assistance accessing journal content, please contact [ehp508@niehs.nih.gov](mailto:ehp508@niehs.nih.gov). Our staff will work with you to assess and meet your accessibility needs within 3 working days.

### **Supplemental Material**

#### **Exposure to low levels of lead in utero and umbilical cord blood DNA methylation in Project Viva: an epigenome-wide association study**

Shaowei Wu, Marie-France Hivert, Andres Cardenas, Jia Zhong, Sheryl L. Rifas-Shiman, Golareh Agha, Elena Colicino, Allan C. Just, Chitra Amarasiriwardena, Xihong Lin, Augusto A. Litonjua, Dawn L. DeMeo, Matthew W. Gillman, Robert O. Wright, Emily Oken, Andrea A. Baccarelli

#### **Table of Contents**

**Table S1.** Epigenetics blood sample size flow in Project Viva

**Table S2.** Maternal red blood cell lead levels by infant sex.

**Table S3.** CpGs with DNA methylation levels in blood samples in mid-childhood associated with prenatal maternal red blood cell lead concentrations in analyses for all children, males and females (loci identified from EWAS for cord blood).

**Table S4 to Table S12 were submitted as EXCEL tables separately.**

**Table S4.** CpGs with DNA methylation levels in umbilical cord blood associated with prenatal maternal red blood cell lead concentrations in analyses for all newborns (n=268, selected based on uncorrected  $p < 0.05$ , coefficients and SEs based on M-values).

**Table S5.** CpGs with DNA methylation levels in umbilical cord blood associated with prenatal maternal red blood cell lead concentrations in analyses for male infants (n=130, selected based on uncorrected  $p < 0.05$ , coefficients and SEs based on M-values).

**Table S6.** CpGs with DNA methylation levels in umbilical cord blood associated with prenatal maternal red blood cell lead concentrations in analyses for female infants (n=138, selected based on uncorrected  $p < 0.05$ , coefficients and SEs based on M-values).

**Table S7.** CpGs with DNA methylation levels in umbilical cord blood associated with prenatal maternal red blood cell lead concentrations in analyses for all newborns without sustained maternal smoking during pregnancy (n=261, selected based on uncorrected  $p < 0.05$ , coefficients and SEs based on M-values).

**Table S8.** CpGs with DNA methylation levels in umbilical cord blood associated with prenatal maternal red blood cell lead concentrations in analyses for male infants without sustained maternal smoking during pregnancy (n=125, selected based on uncorrected  $p < 0.05$ , coefficients and SEs based on M-values).

**Table S9.** CpGs with DNA methylation levels in umbilical cord blood associated with prenatal maternal red blood cell lead concentrations in analyses for female infants without sustained maternal smoking during pregnancy (n=136, selected based on uncorrected  $p < 0.05$ , coefficients and SEs based on M-values).

**Table S10.** CpGs with DNA methylation levels in umbilical cord blood associated with prenatal maternal red blood cell lead concentrations in analyses with adjustment for methylation score instead of smoking status for all newborns (n=268, selected based on uncorrected  $p < 0.05$ , coefficients and SEs based on M-values).

**Table S11.** CpGs with DNA methylation levels in umbilical cord blood associated with prenatal maternal red blood cell lead concentrations in analyses with adjustment for methylation score instead of smoking status for male infants (n=130, selected based on uncorrected  $p < 0.05$ , coefficients and SEs based on M-values).

**Table S12.** CpGs with DNA methylation levels in umbilical cord blood associated with prenatal maternal red blood cell lead concentrations in analyses with adjustment for methylation score instead of smoking status for female infants (n=138, selected based on uncorrected  $p < 0.05$ , coefficients and SEs based on M-values).

**Table S13.** The associations between prenatal maternal red blood cell lead concentrations and umbilical cord blood CpGs identified by Engström et al. (2015) in analyses for all newborns in the present study.

**Table S14.** Differentially methylated regions in cord blood associated with prenatal maternal red blood cell lead concentrations in analyses for all children, males and females (selected based on  $\text{FWER} < 0.25$  in bump hunting analysis).

**Figure S1.** Quantile-quantile plots of the associations between prenatal maternal red blood cell lead concentrations and DNA methylation at 394,460 loci in umbilical cord blood among all newborns (A), male infants (B) and female infants (C).

**Figure S2.** Volcano plots of the associations between prenatal maternal red blood cell lead concentrations and DNA methylation at 394,460 loci in cord blood among all newborns (A), male infants (B) and female infants (C).

**Figure S3.** Scatterplots for prenatal red blood cell lead levels and methylation levels at top loci in umbilical cord blood DNA among all newborns (A-N, upper panel in each page), male infants (MA-MN, middle panel in each page) and female infants (FA-FN, lower panel in each page).

**Table S1. Epigenetics blood sample size flow in Project Viva**

|                                           | Cord blood | Mid-childhood |
|-------------------------------------------|------------|---------------|
| <b>Initial</b>                            | 507        | 473           |
| QC (quality control)                      |            |               |
| Low quality                               | 10         | 6             |
| Sex mismatch                              | 6          | 3             |
| Genotype mismatch                         | 6          | 4             |
| Total removed QC                          | 22         | 13            |
| <b>Total after QC</b>                     | 485        | 460           |
| No maternal lead exposure                 | 216        | 219           |
| Undetectable maternal blood lead          | 1          | 1             |
| <b>Available for statistical analysis</b> | 268        | 240           |

**Table S2. Maternal red blood cell lead levels by infant sex ( $\mu\text{g/dL}$ ).**

|        | N   | Mean | SD   | Min  | Max  | Percentiles     |                 |                  |                  |                  |                  |                  |
|--------|-----|------|------|------|------|-----------------|-----------------|------------------|------------------|------------------|------------------|------------------|
|        |     |      |      |      |      | 1 <sup>st</sup> | 5 <sup>th</sup> | 25 <sup>th</sup> | 50 <sup>th</sup> | 75 <sup>th</sup> | 95 <sup>th</sup> | 99 <sup>th</sup> |
| Male   | 130 | 1.19 | 0.63 | 0.36 | 4.97 | 0.42            | 0.57            | 0.80             | 1.04             | 1.41             | 2.58             | 3.03             |
| Female | 138 | 1.24 | 0.63 | 0.29 | 4.93 | 0.39            | 0.55            | 0.84             | 1.11             | 1.44             | 2.33             | 3.55             |

**Table S3. CpGs with DNA methylation levels in blood samples in mid-childhood associated with prenatal maternal red blood cell lead concentrations in analyses for all children, males and females (loci identified from EWAS for cord blood).**

| CpG                                           | Chr   | Position  | Relation to island | Gene             | Relation to gene | Average methylation (%) <sup>a</sup> | All children                      |                | Males                             |                | Females                           |                | <i>p</i> value for interaction |
|-----------------------------------------------|-------|-----------|--------------------|------------------|------------------|--------------------------------------|-----------------------------------|----------------|-----------------------------------|----------------|-----------------------------------|----------------|--------------------------------|
|                                               |       |           |                    |                  |                  |                                      | Effect estimate (SE) <sup>b</sup> | <i>p</i> value | Effect estimate (SE) <sup>b</sup> | <i>p</i> value | Effect estimate (SE) <sup>b</sup> | <i>p</i> value |                                |
| <b>Top loci identified for all newborns</b>   |       |           |                    |                  |                  |                                      |                                   |                |                                   |                |                                   |                |                                |
| cg02272457                                    | chr6  | 42427790  | Open Sea           | --               | --               | 99.2                                 | -0.01 (0.02)                      | 5.4E-01        | -0.04 (0.02)                      | 2.9E-02        | 0.04 (0.03)                       | 2.7E-01        | 0.01                           |
| cg20324491                                    | chr7  | 149128397 | N_Shore            | --               | --               | 94.2                                 | -0.03 (0.1)                       | 7.5E-01        | 0.0 (0.2)                         | 9.6E-01        | -0.1 (0.2)                        | 6.2E-01        | 0.44                           |
| cg22112000                                    | chr7  | 5647182   | Island             | --               | --               | 98.7                                 | -0.01 (0.01)                      | 4.0E-01        | -0.03 (0.0)                       | 2.0E-01        | 0.01 (0.02)                       | 6.3E-01        | 0.62                           |
| cg10773601                                    | chr19 | 51226046  | N_Shore            | <i>CLEC11A</i>   | TSS1500          | 86.4                                 | -0.5 (0.3)                        | 1.5E-01        | -0.21 (0.41)                      | 6.1E-01        | -0.7 (0.5)                        | 1.6E-01        | 0.14                           |
| <b>Top loci identified for male infants</b>   |       |           |                    |                  |                  |                                      |                                   |                |                                   |                |                                   |                |                                |
| cg22512536                                    | chr5  | 154134507 | Island             | <i>LARPI</i>     | Body             | 1.9                                  | -0.03 (0.04)                      | 4.6E-01        | -0.1 (0.04)                       | 4.8E-02        | 0.03 (0.05)                       | 5.2E-01        | 0.16                           |
| cg08964024                                    | chr12 | 14923326  | Island             | --               | --               | 1.6                                  | -0.001 (0.03)                     | 9.6E-01        | -0.01 (0.03)                      | 8.7E-01        | 0.01 (0.04)                       | 7.4E-01        | 0.99                           |
| <b>Top loci identified for female infants</b> |       |           |                    |                  |                  |                                      |                                   |                |                                   |                |                                   |                |                                |
| cg04295372                                    | chr1  | 101184332 | Open Sea           | <i>VCAM1</i>     | TSS1500          | 51.8                                 | -0.02 (0.3)                       | 9.6E-01        | 0.1 (0.5)                         | 9.1E-01        | -0.3 (0.4)                        | 4.3E-01        | 0.97                           |
| cg09356083                                    | chr1  | 2430057   | N_Shelf            | <i>PLCH2</i>     | Body             | 86.3                                 | -0.1 (0.1)                        | 2.3E-01        | -0.3 (0.2)                        | 1.1E-01        | -0.004 (0.1)                      | 9.8E-01        | 0.60                           |
| cg20816789                                    | chr1  | 27462916  | Open Sea           | <i>SLC9A1</i>    | Body             | 86.3                                 | 0.1 (0.1)                         | 5.8E-01        | 0.1 (0.2)                         | 4.6E-01        | 0.1 (0.2)                         | 4.8E-01        | 0.94                           |
| cg22446399                                    | chr2  | 27326580  | Open Sea           | <i>CGREF1</i>    | Body             | 96.4                                 | 0.04 (0.1)                        | 7.2E-01        | -0.01 (0.2)                       | 9.6E-01        | 0.1 (0.1)                         | 4.8E-01        | 0.97                           |
| cg27403609                                    | chr2  | 11101403  | Island             | --               | --               | 92.7                                 | -0.1 (0.3)                        | 7.3E-01        | 0.1 (0.4)                         | 9.0E-01        | -0.4 (0.4)                        | 3.9E-01        | 0.17                           |
| cg07248017                                    | chr4  | 8230689   | Open Sea           | <i>SH3TC1</i>    | Body             | 62.4                                 | 0.1 (0.2)                         | 7.2E-01        | 0.2 (0.3)                         | 5.2E-01        | -0.01 (0.3)                       | 9.7E-01        | 0.40                           |
| cg06239355                                    | chr5  | 32714010  | Island             | <i>NPR3</i>      | Body             | 2.1                                  | 0.01 (0.03)                       | 8.3E-01        | 0.03 (0.05)                       | 5.5E-01        | -0.02 (0.05)                      | 6.3E-01        | 0.54                           |
| cg15601915                                    | chr5  | 1065775   | S_Shore            | <i>SLC12A7</i>   | Body             | 84.6                                 | -0.01 (0.2)                       | 9.4E-01        | 0.4 (0.2)                         | 1.1E-01        | -0.3 (0.2)                        | 1.5E-01        | 0.01                           |
| cg17599748                                    | chr6  | 31589597  | S_Shore            | <i>SNORA38</i>   | TSS1500          | 72.8                                 | 0.1 (0.3)                         | 8.2E-01        | -0.04 (0.3)                       | 9.1E-01        | 0.1 (0.5)                         | 9.1E-01        | 0.60                           |
| cg08673909                                    | chr7  | 1329592   | Island             | --               | --               | 3.3                                  | 0.03 (0.1)                        | 7.3E-01        | 0.2 (0.1)                         | 6.5E-02        | -0.2 (0.1)                        | 1.4E-01        | 0.01                           |
| cg10090217                                    | chr7  | 45151583  | S_Shore            | <i>TBRG4</i>     | TSS1500          | 2.1                                  | 0.04 (0.02)                       | 4.3E-02        | 0.1 (0.02)                        | 6.6E-03        | -0.001 (0.03)                     | 9.8E-01        | 0.11                           |
| cg16565528                                    | chr8  | 91010920  | N_Shelf            | --               | --               | 79.3                                 | 0.06 (0.4)                        | 8.8E-01        | -0.04 (0.5)                       | 9.3E-01        | 0.2 (0.5)                         | 6.5E-01        | 0.81                           |
| cg03152353                                    | chr9  | 139417194 | Island             | <i>NOTCH1</i>    | Body             | 64.2                                 | 0.3 (0.2)                         | 2.3E-01        | 0.4 (0.4)                         | 3.0E-01        | -0.04 (0.3)                       | 8.8E-01        | 0.46                           |
| cg13817920                                    | chr9  | 96587843  | N_Shore            | --               | --               | 92.0                                 | 0.2 (0.1)                         | 1.3E-01        | 0.2 (0.2)                         | 2.4E-01        | 0.2 (0.2)                         | 3.9E-01        | 0.86                           |
| cg13791644                                    | chr10 | 119794366 | Open Sea           | <i>RAB11FIP2</i> | Body             | 94.2                                 | 0.1 (0.2)                         | 6.0E-01        | 0.2 (0.2)                         | 2.4E-01        | -0.04 (0.3)                       | 9.1E-01        | 0.46                           |
| cg18454045                                    | chr10 | 88391658  | N_Shore            | --               | --               | 72.9                                 | 0.2 (0.3)                         | 4.3E-01        | 0.6 (0.4)                         | 2.0E-01        | -0.1 (0.4)                        | 8.7E-01        | 0.32                           |
| cg11127561                                    | chr11 | 125462151 | N_Shore            | <i>STT3A</i>     | TSS1500          | 1.5                                  | -0.02 (0.02)                      | 3.9E-01        | 0.004 (0.03)                      | 9.0E-01        | -0.04 (0.03)                      | 1.9E-01        | 0.46                           |
| cg17971003                                    | chr11 | 107582804 | OpenSea            | <i>SLN</i>       | TSS200           | 93.9                                 | 0.05 (0.2)                        | 7.9E-01        | -0.1 (0.2)                        | 6.6E-01        | 0.3 (0.3)                         | 3.0E-01        | 0.61                           |
| cg24637308                                    | chr11 | 6592297   | Island             | <i>DNHD1</i>     | Body             | 79.9                                 | -2.5 (0.9)                        | 4.7E-03        | -1.3 (1.5)                        | 3.5E-01        | -4.1 (1.4)                        | 2.7E-03        | 0.13                           |
| cg05959994                                    | chr13 | 114253916 | Open Sea           | <i>TFDP1</i>     | Body             | 98.5                                 | -0.03 (0.04)                      | 4.6E-01        | -0.1 (0.1)                        | 3.8E-01        | -0.05 (0.1)                       | 4.8E-01        | 0.93                           |
| cg11203293                                    | chr13 | 25777762  | Open Sea           | --               | --               | 68.1                                 | -0.7 (0.6)                        | 2.4E-01        | -0.2 (0.9)                        | 7.8E-01        | -1.3 (0.8)                        | 9.8E-02        | 0.59                           |
| cg04545835                                    | chr14 | 102675570 | Open Sea           | <i>WDR20</i>     | Body             | 97.2                                 | 0.01 (0.1)                        | 9.2E-01        | -0.2 (0.1)                        | 8.8E-02        | 0.2 (0.1)                         | 3.6E-02        | 0.06                           |
| cg08131309                                    | chr15 | 40399131  | N_Shore            | <i>BMF</i>       | TSS1500          | 34.4                                 | 0.1 (0.2)                         | 7.2E-01        | 0.3 (0.3)                         | 3.2E-01        | -0.2 (0.3)                        | 5.3E-01        | 0.56                           |
| cg04730825                                    | chr16 | 16116191  | Open Sea           | <i>ABCC1</i>     | Body             | 33.0                                 | -0.1 (0.1)                        | 3.3E-01        | 0.1 (0.2)                         | 6.4E-01        | -0.4 (0.2)                        | 6.2E-02        | 0.24                           |
| cg26686608                                    | chr16 | 88705716  | N_Shore            | <i>IL17C</i>     | Body             | 42.3                                 | 0.5 (0.3)                         | 9.8E-02        | 0.3 (0.5)                         | 5.9E-01        | 0.6 (0.4)                         | 1.6E-01        | 0.73                           |
| cg00461015                                    | chr17 | 42295635  | N_Shore            | <i>UBTF</i>      | 5'UTR            | 1.8                                  | -0.04 (0.03)                      | 1.5E-01        | -0.004 (0.03)                     | 9.1E-01        | -0.1 (0.04)                       | 8.9E-02        | 0.21                           |
| cg04571282                                    | chr17 | 44108753  | Open Sea           | <i>KIAA1267</i>  | 3'UTR            | 98.3                                 | -0.1 (0.03)                       | 3.0E-02        | -0.1 (0.04)                       | 2.5E-02        | -0.04 (0.1)                       | 4.3E-01        | 0.58                           |
| cg11252953                                    | chr17 | 80358829  | N_Shelf            | <i>C17orf101</i> | Body             | 6.2                                  | -0.1 (0.2)                        | 4.3E-01        | -0.3 (0.2)                        | 2.5E-01        | 0.1 (0.3)                         | 6.0E-01        | 0.61                           |
| cg15922057                                    | chr17 | 25784714  | S_Shore            | --               | --               | 27.4                                 | -0.1 (0.3)                        | 8.3E-01        | -0.3 (0.4)                        | 4.9E-01        | 0.2 (0.5)                         | 5.9E-01        | 0.55                           |
| cg06753949                                    | chr19 | 15334309  | Island             | --               | --               | 1.9                                  | -0.03 (0.04)                      | 5.0E-01        | -0.04 (0.1)                       | 5.2E-01        | -0.04 (0.1)                       | 5.1E-01        | 0.60                           |
| cg07780528                                    | chr19 | 35630334  | N_Shelf            | <i>FXYD1</i>     | 5'UTR            | 32.9                                 | -0.2 (0.2)                        | 4.7E-01        | 0.3 (0.4)                         | 3.7E-01        | -0.5 (0.3)                        | 7.6E-02        | 0.13                           |
| cg11610754                                    | chr19 | 18722595  | Island             | <i>TMEM59L</i>   | TSS1500          | 1.8                                  | 0.04 (0.02)                       | 1.2E-01        | 0.1 (0.03)                        | 8.8E-02        | 0.02 (0.03)                       | 6.1E-01        | 0.53                           |
| cg18598117                                    | chr19 | 941126    | Island             | <i>ARID3A</i>    | Body             | 23.4                                 | -0.6 (0.5)                        | 2.5E-01        | -0.4 (0.7)                        | 5.1E-01        | -0.7 (0.8)                        | 3.8E-01        | 0.83                           |

|            |       |          |         |                |         |      |             |         |            |         |             |         |      |
|------------|-------|----------|---------|----------------|---------|------|-------------|---------|------------|---------|-------------|---------|------|
| cg22217660 | chr19 | 50765301 | S_Shelf | <i>MYH14</i>   | Body    | 94.3 | -0.3 (0.2)  | 1.6E-01 | -0.3 (0.3) | 3.3E-01 | -0.3 (0.2)  | 1.4E-01 | 0.62 |
| cg03373781 | chr20 | 30582113 | N_Shore | <i>XKR7</i>    | Body    | 70.7 | -0.1 (0.2)  | 5.7E-01 | -0.1 (0.3) | 8.3E-01 | -0.1 (0.3)  | 8.0E-01 | 0.88 |
| cg07341934 | chr20 | 57463711 | Island  | <i>GNAS</i>    | 3'UTR   | 57.5 | -0.1 (0.4)  | 7.8E-01 | 0.2 (0.5)  | 7.3E-01 | -0.3 (0.5)  | 5.0E-01 | 0.32 |
| cg21307155 | chr20 | 3216740  | N_Shore | <i>SLC4A11</i> | Body    | 83.7 | -0.1 (0.2)  | 6.5E-01 | 0.03 (0.2) | 9.0E-01 | -0.04 (0.3) | 8.8E-01 | 0.94 |
| cg17174023 | chr22 | 50987453 | Island  | <i>KLHDC7B</i> | 1stExon | 9.5  | -0.01 (0.3) | 9.7E-01 | 0.7 (0.4)  | 1.1E-01 | -0.7 (0.4)  | 8.7E-02 | 0.11 |

Abbreviations: Chr, Chromosome; FDR, false discovery rate; SE, standard error; TSS200, within 200 bps from transcription start site; TSS1500, within 1500 bps from transcription start site; Body, gene body; UTR, untranslated regions.

<sup>a</sup> Average methylation in blood samples in mid-childhood.

<sup>b</sup> The percent change in DNA methylation level for every doubling increase in prenatal maternal red blood cell lead concentrations. Adjusted for child sex, maternal age, maternal pre-pregnancy BMI, maternal race, maternal educational level, maternal smoking status, parity, gestational age, child age at sample collection and differential nucleated cell proportions (monocytes, CD8+ T cells, CD4+ T cells, Natural Killer cells and B cells).

**Table S4 to Table S12 were submitted as EXCEL tables separately.**

**Table S13. The associations between prenatal maternal red blood cell lead concentrations and umbilical cord blood CpGs identified by Engström et al. (2015) in analyses for all newborns in the present study.**

| CpG        | Chr | Position  | Relation island to | Gene            | Relation gene to | Average methylation (%) <sup>a</sup> | Effect estimate (SE) <sup>b</sup> | <i>p</i> value |
|------------|-----|-----------|--------------------|-----------------|------------------|--------------------------------------|-----------------------------------|----------------|
| cg18355337 | 19  | 55549722  | Open Sea           | <i>GP6</i>      | TSS200           | 65.0                                 | 1.7 (1.2)                         | 1.6E-01        |
| cg25196158 | 1   | 214152979 | N_Shore            | --              | --               | 5.0                                  | -0.1 (0.1)                        | 5.8E-01        |
| cg16943697 | 2   | 120280763 | N_Shore            | <i>SCTR</i>     | Body             | 51.3                                 | 0.1 (0.2)                         | 7.2E-01        |
| cg03833077 | 19  | 10024709  | Island             | <i>OLFM2</i>    | Body             | 31.4                                 | 0.1 (0.3)                         | 7.2E-01        |
| cg12504721 | 5   | 138897583 | Island             | --              | --               | 2.1                                  | 0.04 (0.03)                       | 2.3E-01        |
| cg23796967 | 19  | 55549590  | Open Sea           | <i>GP6</i>      | 1st Exon         | 7.6                                  | 0.1 (0.6)                         | 9.0E-01        |
| cg00145875 | 2   | 11104394  | S_Shelf            | --              | --               | 83.2                                 | 0.4 (0.2)                         | 1.0E-01        |
| cg25818583 | 19  | 55549801  | Open Sea           | <i>GP6</i>      | TSS200           | 74.1                                 | -0.1 (0.6)                        | 8.8E-01        |
| cg23173307 | 4   | 786244    | Island             | <i>CPLX1</i>    | Body             | 2.0                                  | -0.05 (0.03)                      | 7.6E-02        |
| cg04942107 | 10  | 3918567   | Open Sea           | --              | --               | 92.8                                 | -0.1 (0.1)                        | 5.4E-01        |
| cg05374025 | 19  | 55549746  | Open Sea           | <i>GP6</i>      | TSS200           | 50.0                                 | 2.0 (0.9)                         | 3.1E-02        |
| cg26668675 | 6   | 31148463  | Island             | --              | --               | 55.6                                 | 0.1 (0.7)                         | 9.0E-01        |
| cg25472897 | 8   | 145560555 | Island             | <i>SCRT1</i>    | TSS1500          | 20.5                                 | -0.1 (0.3)                        | 7.1E-01        |
| cg00436174 | 2   | 128051630 | Island             | <i>ERCC3</i>    | 1st Exon         | 7.8                                  | 0.2 (0.1)                         | 6.3E-02        |
| cg11790196 | 14  | 89995679  | Open Sea           | <i>FOXN3</i>    | 5'UTR            | 96.9                                 | 0.01 (0.1)                        | 9.2E-01        |
| cg01519017 | 3   | 61227050  | Open Sea           | <i>FHIT</i>     | 5'UTR            | 97.7                                 | -0.1 (0.05)                       | 6.5E-02        |
| cg16653408 | 22  | 42313569  | N_Shore            | --              | --               | 79.9                                 | -0.2 (0.2)                        | 2.2E-01        |
| cg03978169 | 6   | 33091357  | Open Sea           | <i>HLA-DPB2</i> | Body             | 95.9                                 | -0.02 (0.1)                       | 8.8E-01        |
| cg18461584 | 7   | 55304314  | Open Sea           | --              | --               | 95.8                                 | 0.1 (0.1)                         | 2.0E-01        |
| cg23352003 | 18  | 24237245  | Island             | --              | --               | 7.1                                  | 0.01 (0.2)                        | 9.4E-01        |
| cg07313720 | 2   | 209029594 | Open Sea           | <i>CRYGA</i>    | TSS1500          | 95.1                                 | -0.1 (0.1)                        | 6.7E-01        |
| cg04432660 | 7   | 4802132   | Island             | <i>FO XK1</i>   | 3'UTR            | 98.6                                 | -0.01 (0.02)                      | 4.5E-01        |
| cg04606773 | 10  | 134759693 | S_Shelf            | --              | --               | 97.4                                 | 0.02 (0.1)                        | 8.0E-01        |
| cg22994018 | 11  | 105448797 | Open Sea           | --              | --               | 78.3                                 | -0.5 (0.8)                        | 5.3E-01        |
| cg25979157 | 19  | 53902687  | S_Shelf            | <i>ZNF765</i>   | Body             | 98.5                                 | -0.02 (0.04)                      | 5.8E-01        |
| cg11774346 | 21  | 46797899  | N_Shelf            | --              | --               | 96.3                                 | -0.02 (0.1)                       | 8.0E-01        |
| cg11668188 | 1   | 7891116   | S_Shelf            | <i>PER3</i>     | Body             | 94.7                                 | 0.1 (0.2)                         | 7.2E-01        |
| cg25192902 | 11  | 121163419 | Island             | <i>SC5DL</i>    | 5'UTR            | 1.4                                  | 0.02 (0.02)                       | 1.3E-01        |
| cg24737570 | 2   | 11727173  | Open Sea           | <i>GREB1</i>    | Body             | 86.5                                 | -0.003 (0.2)                      | 9.8E-01        |
| cg05749559 | 8   | 36793457  | Open Sea           | <i>KCNU1</i>    | 3'UTR            | 92.4                                 | 0.1 (0.2)                         | 7.6E-01        |



Abbreviations: Chr, Chromosome; FDR, false discovery rate; SE, standard error; TSS200, within 200 bps from transcription start site; TSS1500, within 1500 bps from transcription start site; Body, gene body; UTR, untranslated regions.

<sup>a</sup> Average methylation in umbilical cord blood among all newborns.

<sup>b</sup> The percent change in DNA methylation level for every doubling increase in prenatal maternal red blood cell lead concentrations. Adjusted for child sex, maternal age, maternal pre-pregnancy BMI, maternal race, maternal educational level, maternal smoking status, parity, gestational age and differential nucleated cell proportions (monocytes, CD8+ T cells, CD4+ T cells, Natural Killer cells, B cells and nucleated red blood cells).

**Table S14. Differentially methylated regions in cord blood associated with prenatal maternal red blood cell lead concentrations in analyses for all children, males and females (selected based on FWER<0.25 in bump hunting analysis).**

| Chr                   | Start <sup>a</sup> | End <sup>a</sup> | Gene     | Effect estimate <sup>b</sup> | Area <sup>c</sup> | No. of CpGs | <i>p</i> value | FWER  |
|-----------------------|--------------------|------------------|----------|------------------------------|-------------------|-------------|----------------|-------|
| <b>All newborns</b>   |                    |                  |          |                              |                   |             |                |       |
| chr13                 | 50194554           | 50194643         | --       | -9.20                        | 0.185             | 2           | 6.50E-06       | 0.027 |
| chr5                  | 1594282            | 1594863          | SDHAP3   | -4.00                        | 0.404             | 10          | 4.01E-05       | 0.159 |
| chr12                 | 31271429           | 31272119         | --       | -5.20                        | 0.261             | 5           | 5.38E-05       | 0.196 |
| chr6                  | 32632159           | 32632338         | HLA-DQB1 | 5.90                         | 0.235             | 4           | 5.29E-05       | 0.202 |
| chr19                 | 12876846           | 12877188         | HOOK2    | 5.70                         | 0.230             | 4           | 6.50E-05       | 0.244 |
| <b>Male infants</b>   |                    |                  |          |                              |                   |             |                |       |
| chr6                  | 29648271           | 29649084         | --       | -4.70                        | 1.040             | 22          | 6.50E-06       | 0.028 |
| chr5                  | 135415819          | 135416613        | --       | 6.00                         | 0.783             | 13          | 1.09E-05       | 0.047 |
| chr6                  | 32551749           | 32552205         | HLA-DRB1 | -5.80                        | 0.634             | 11          | 4.32E-05       | 0.165 |
| <b>Female infants</b> |                    |                  |          |                              |                   |             |                |       |
| chr19                 | 13875014           | 13875137         | --       | 8.90                         | 0.266             | 3           | 7.27E-05       | 0.228 |

Abbreviations: Chr, Chromosome; FWER, family-wise error rate.

<sup>a</sup> Position of start and end of the differentially methylated region.

<sup>b</sup> The percent change in DNA methylation level for every doubling increase in prenatal maternal red blood cell lead concentrations. Adjusted for child sex, maternal age, maternal pre-pregnancy BMI, maternal race, maternal educational level, maternal smoking status, parity, gestational age and differential nucleated cell proportions (monocytes, CD8+ T cells, CD4+ T cells, Natural Killer cells, B cells and nucleated red blood cells).

<sup>c</sup> The strength of evidence for each differentially methylated region is summarized with its area.

**Figure S1.** Quantile-quantile plots of the associations between prenatal maternal red blood cell lead concentrations and DNA methylation at 394,460 loci in umbilical cord blood among all newborns (A), male infants (B) and female infants (C).

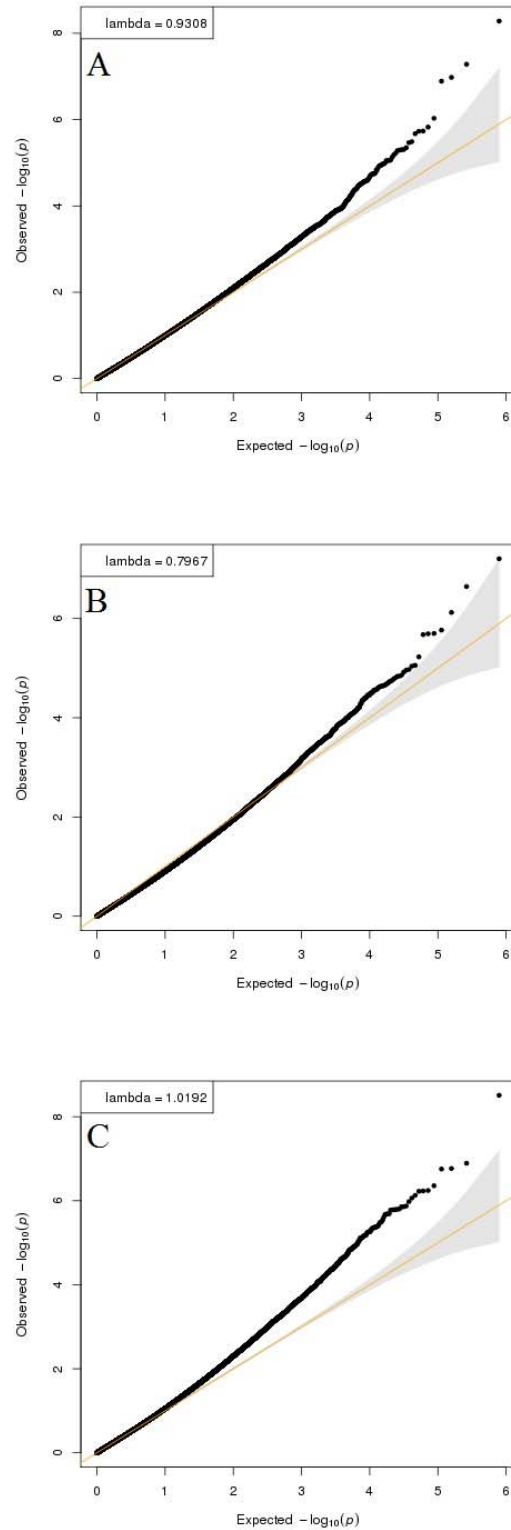

**Figure S2.** Volcano plots of the associations between prenatal maternal red blood cell lead concentrations and DNA methylation at 394,460 loci in cord blood among all newborns (A), male infants (B) and female infants

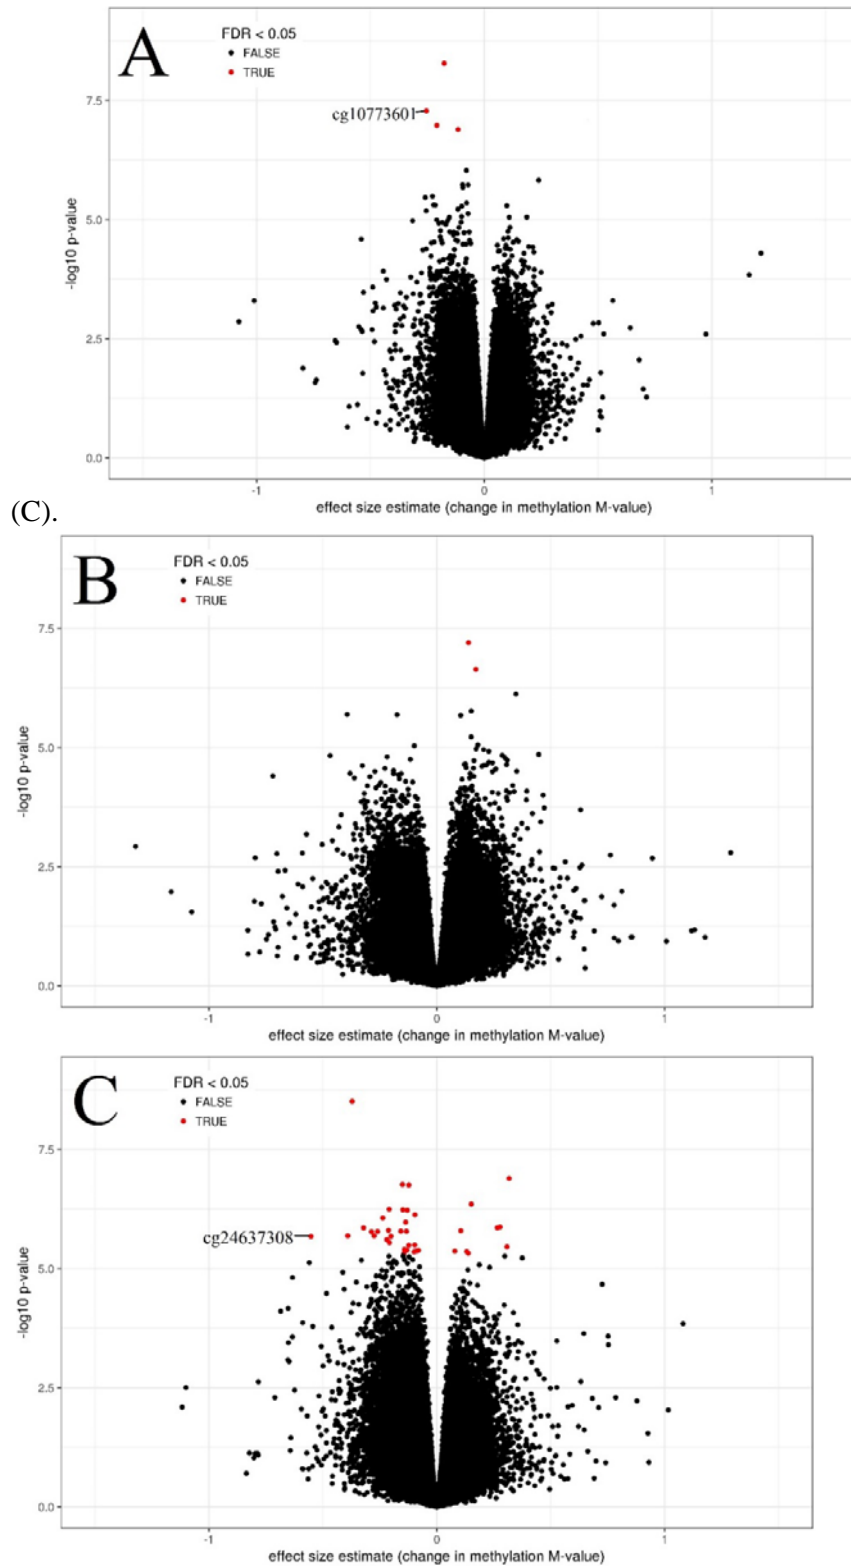

**Figure S3.** Scatterplots for prenatal red blood cell lead levels and methylation levels at top loci in umbilical cord blood DNA among all newborns (A-N, upper panel in each page), male infants (MA-MN, middle panel in each page) and female infants (FA-FN, lower panel in each page).

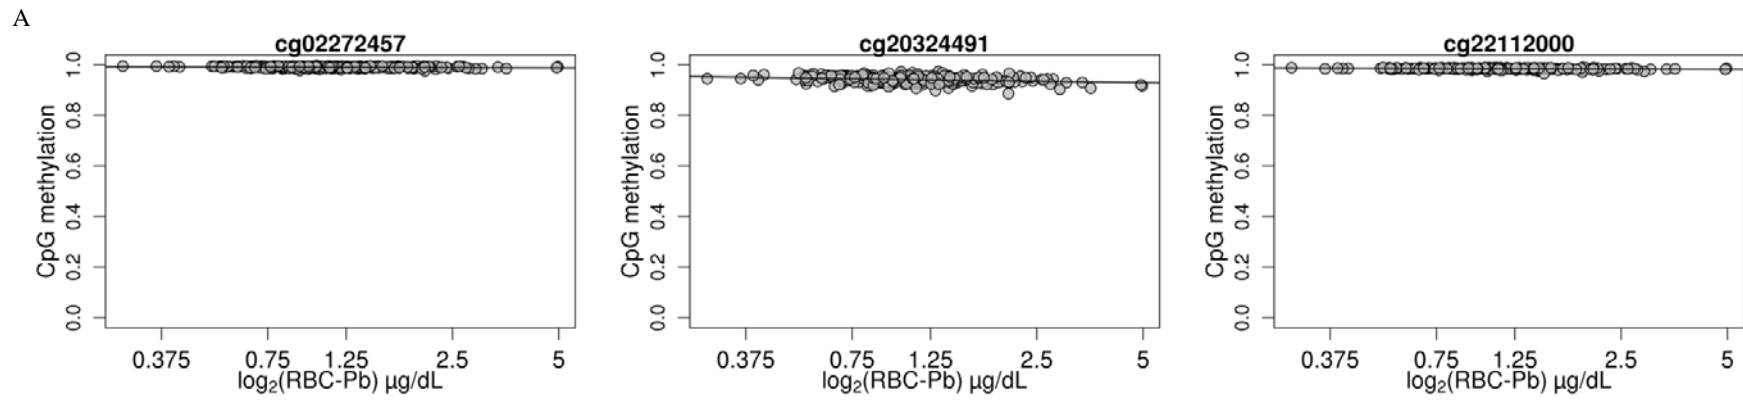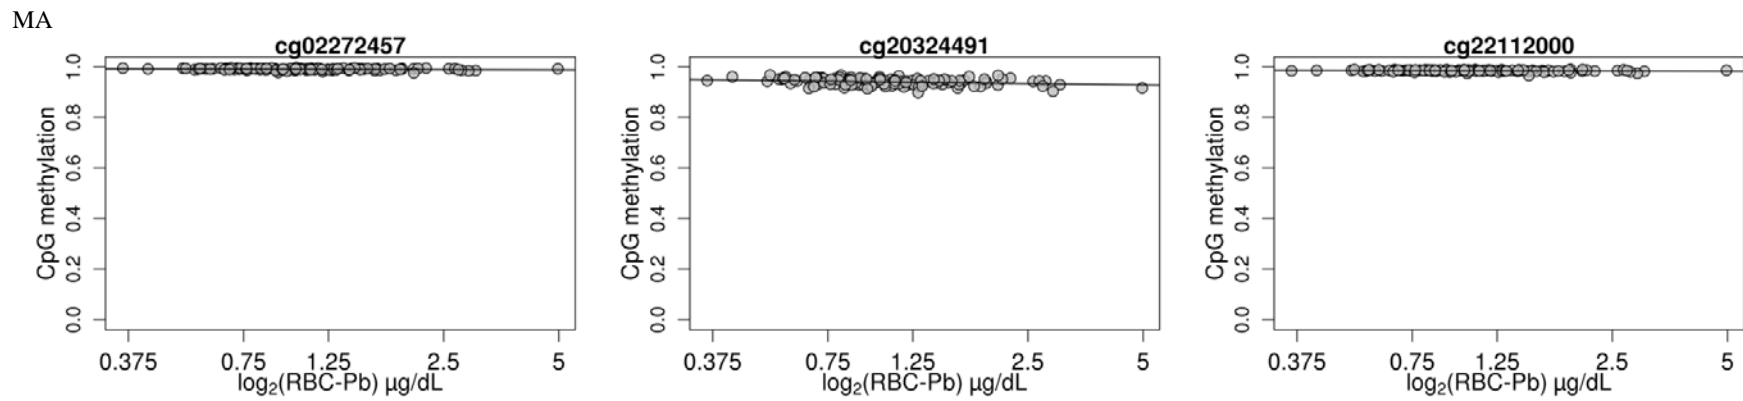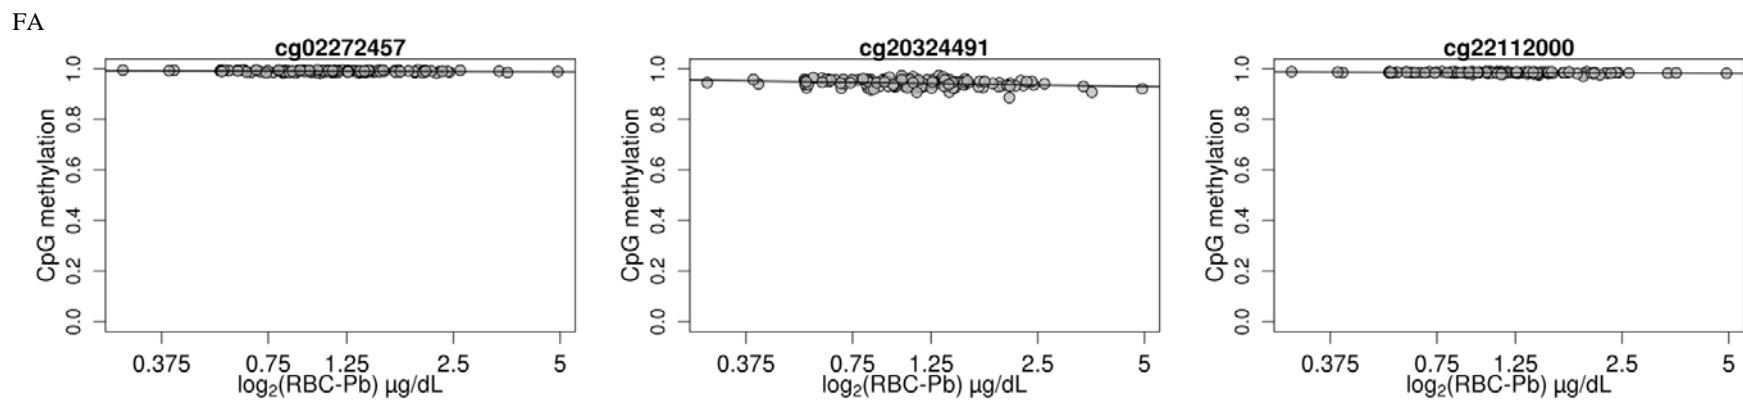

B

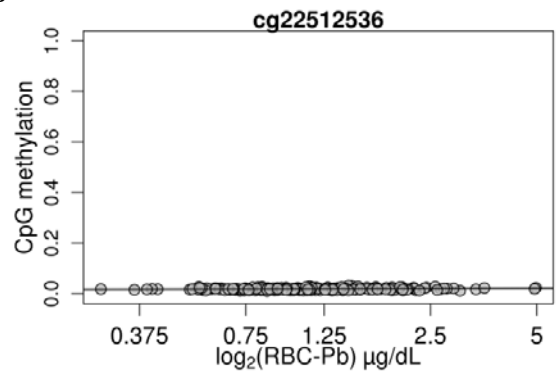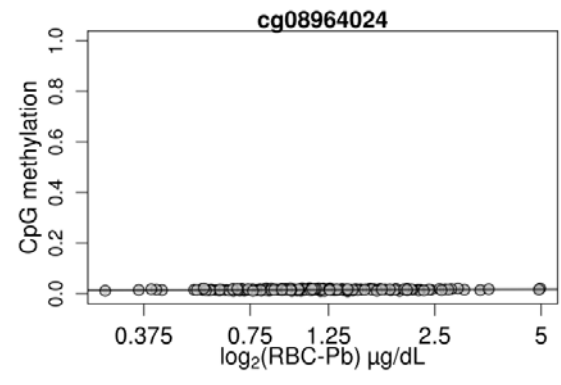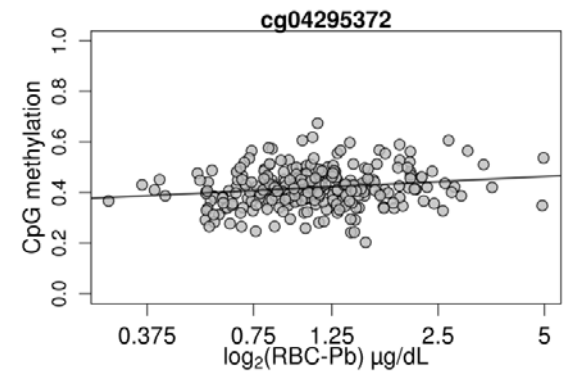

MB

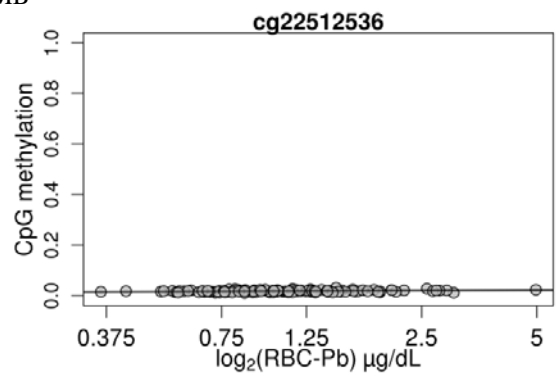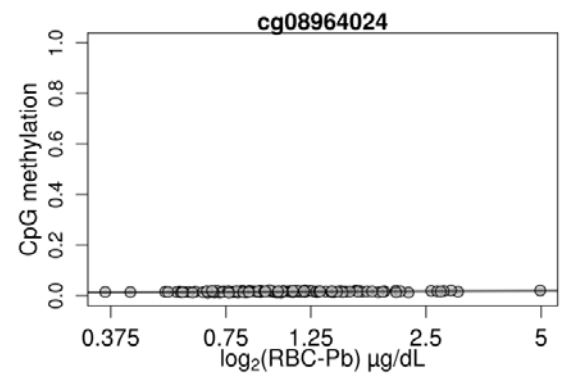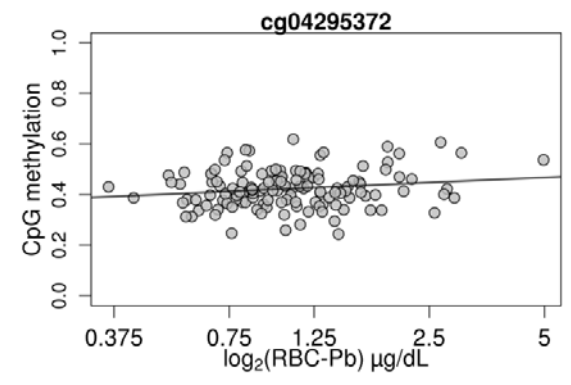

FB

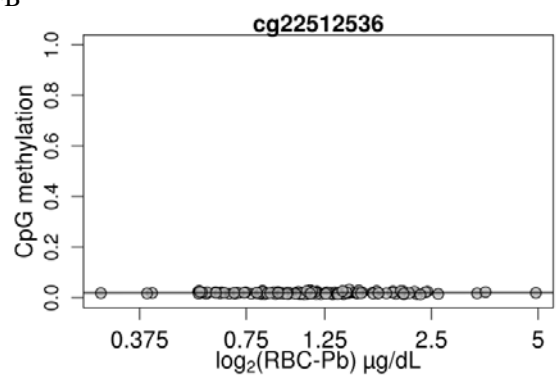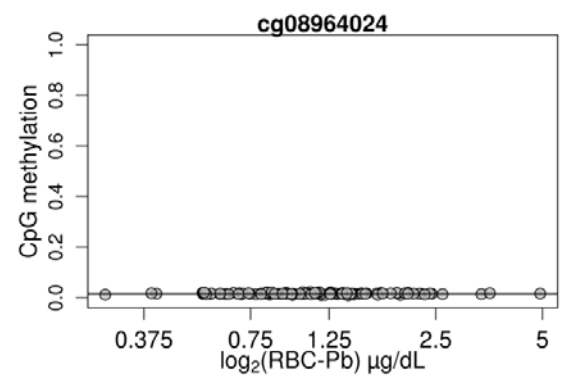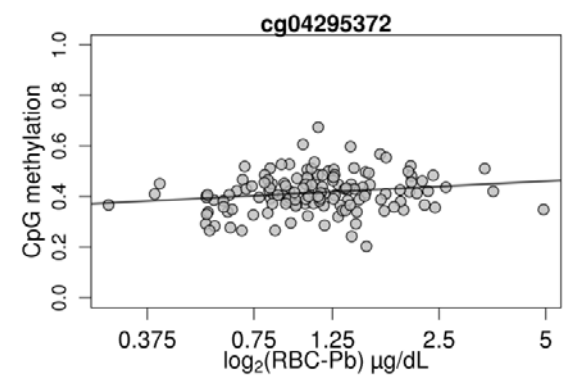

C

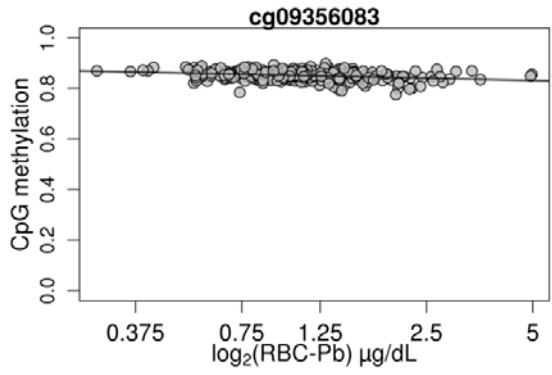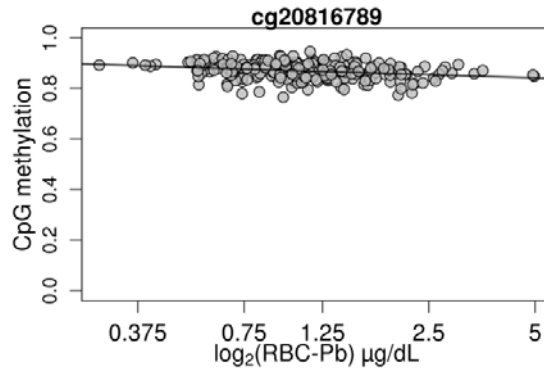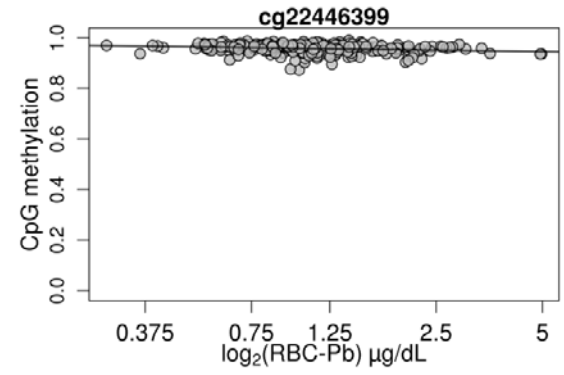

MC

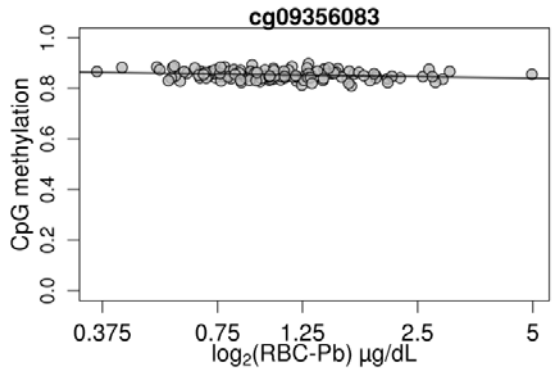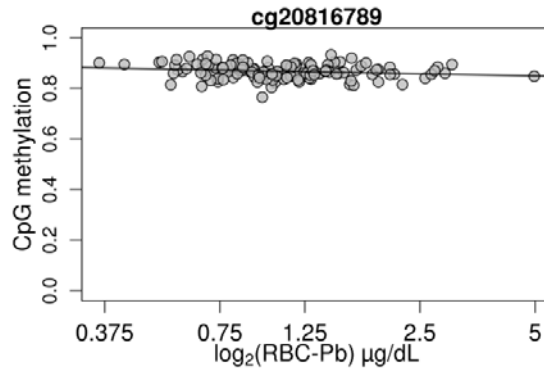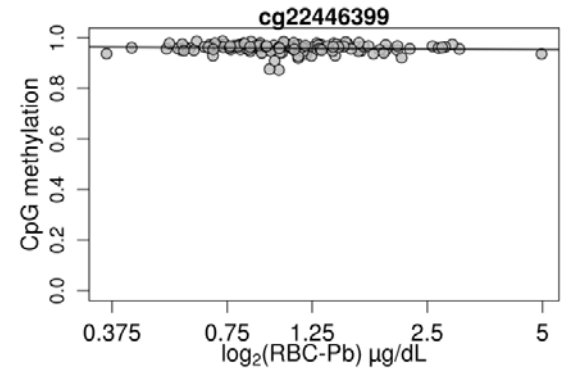

FC

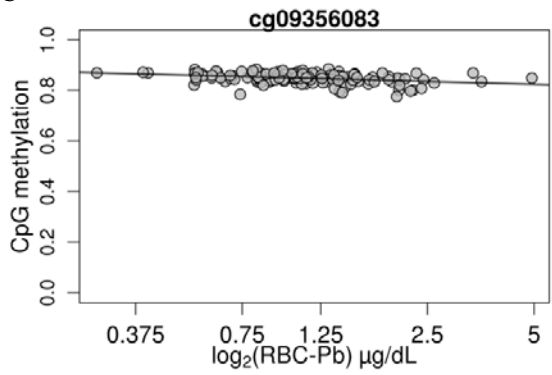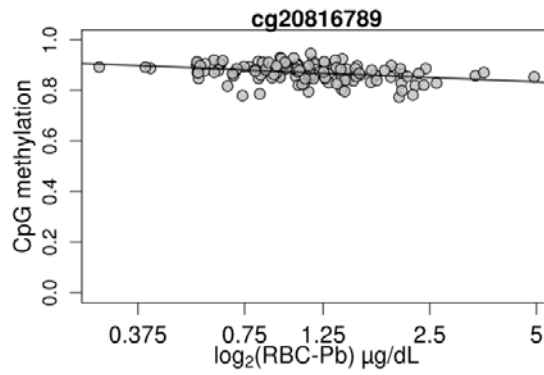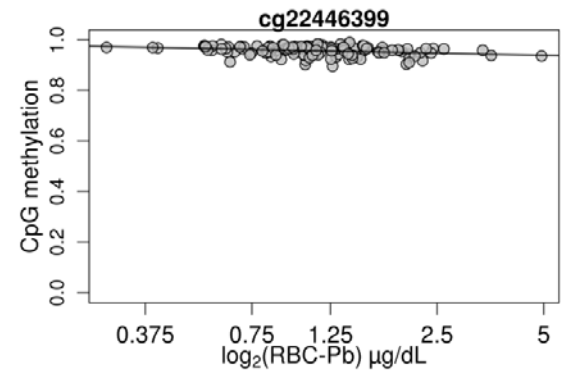



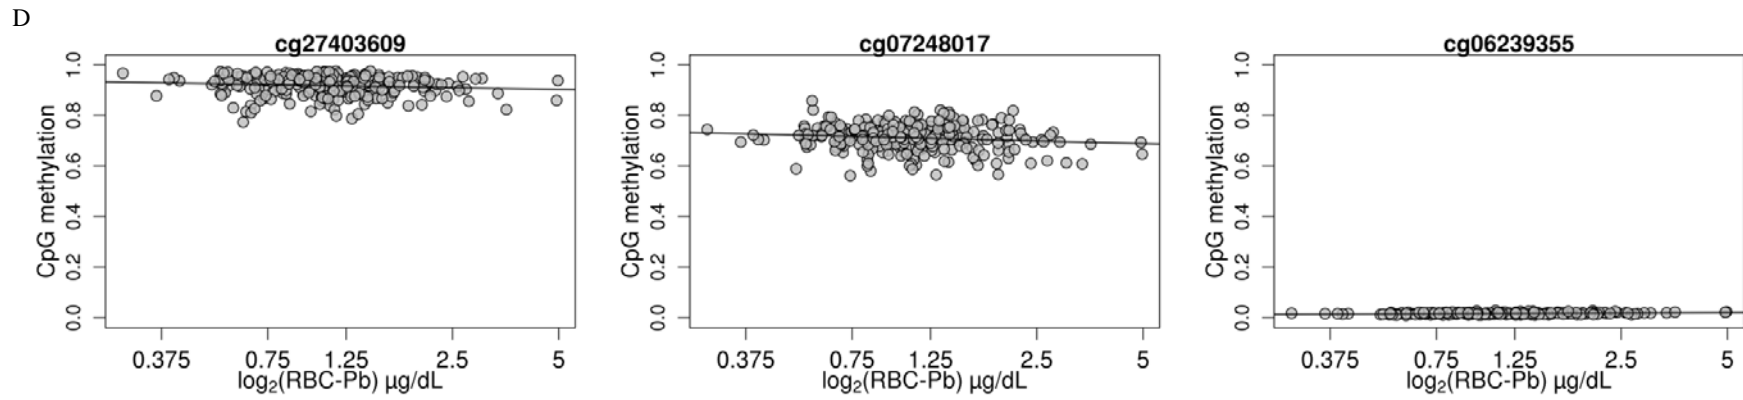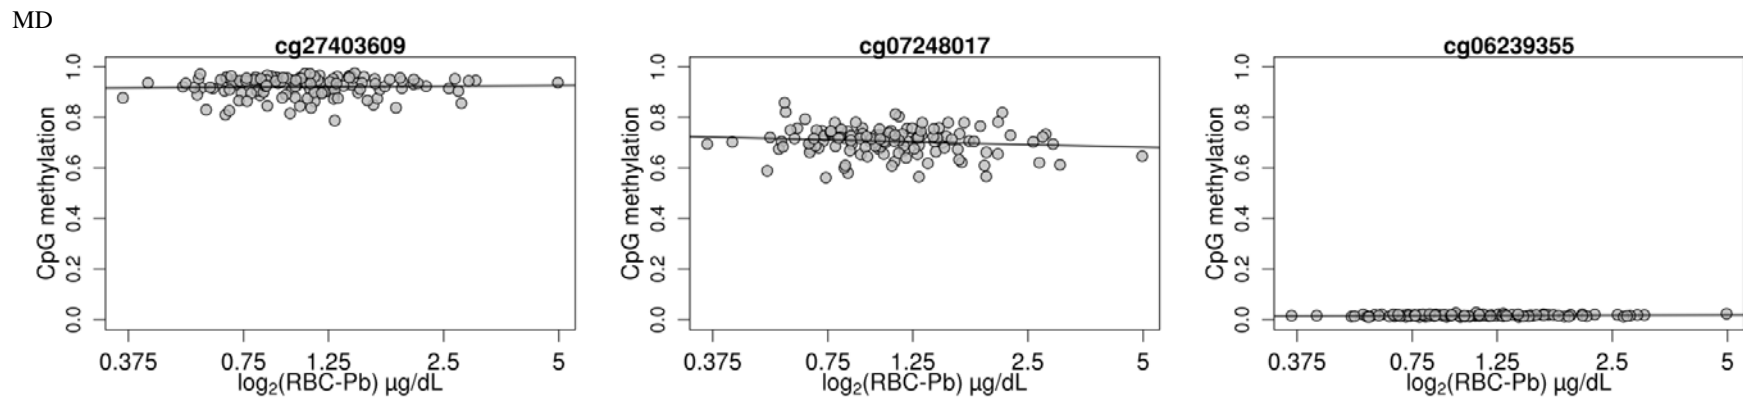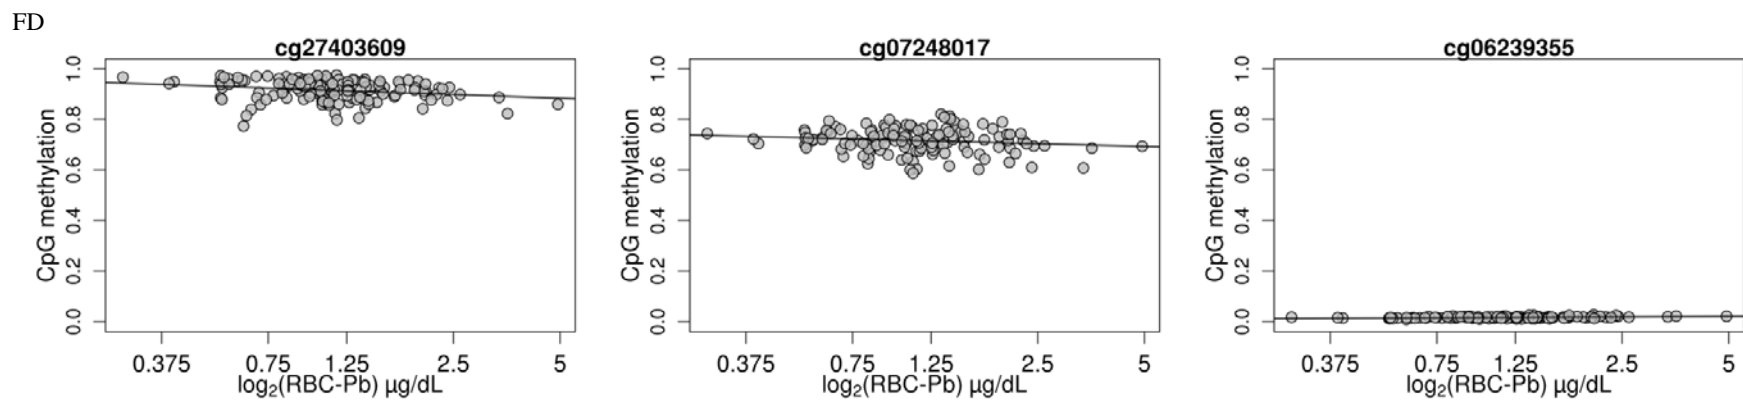

E

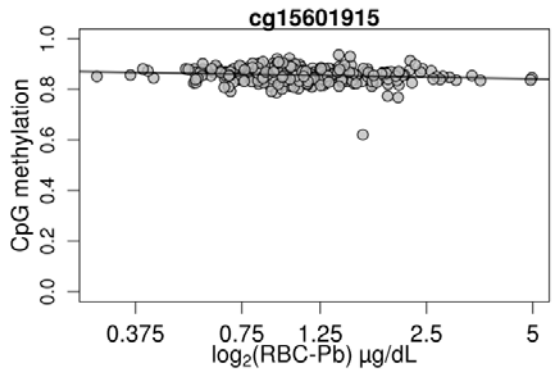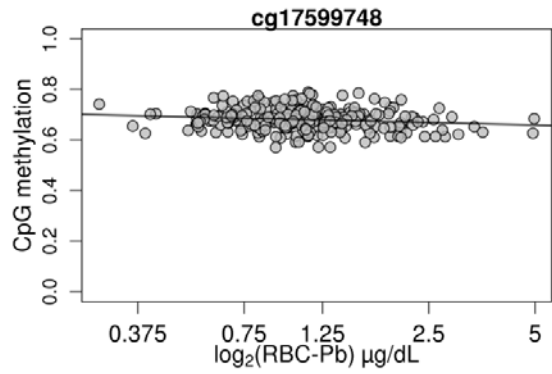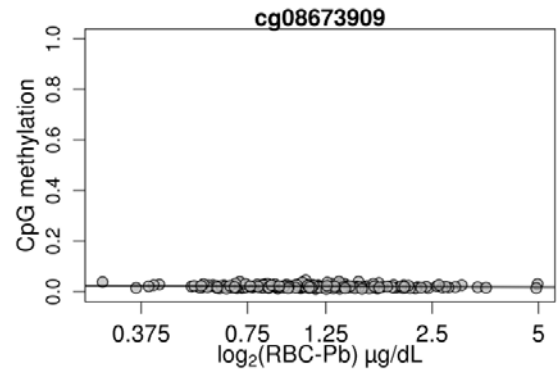

ME

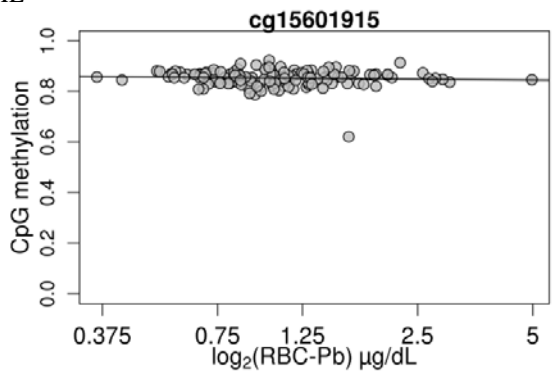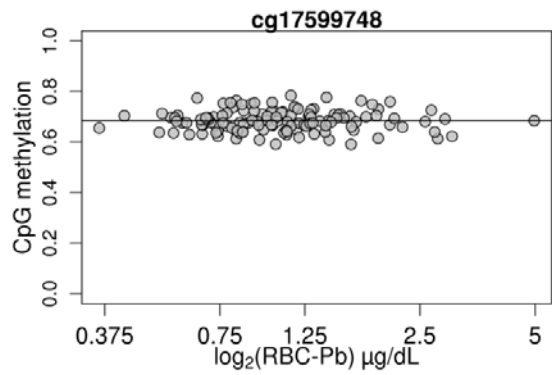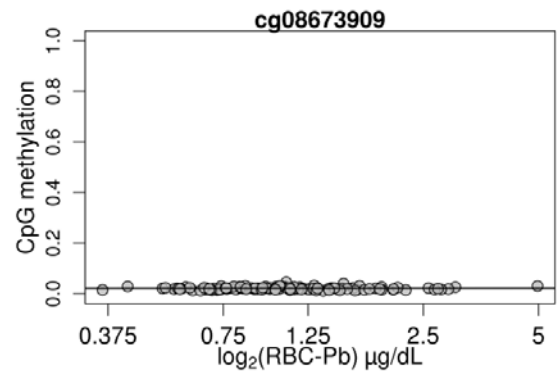

FE

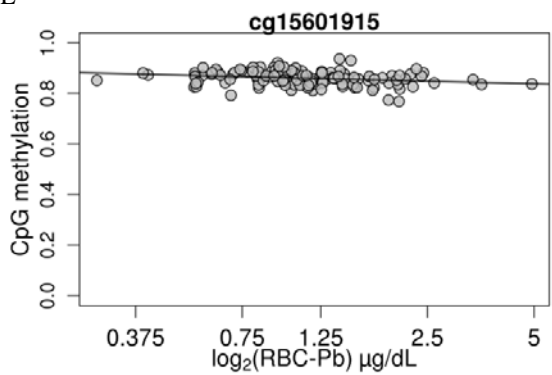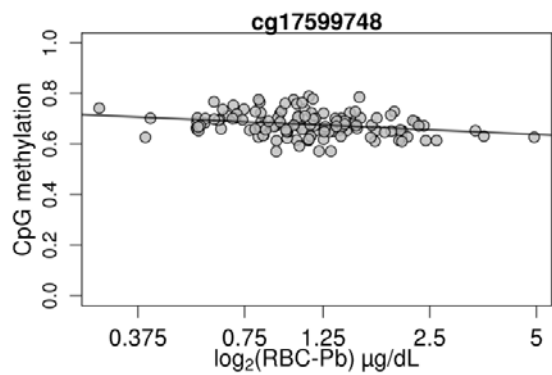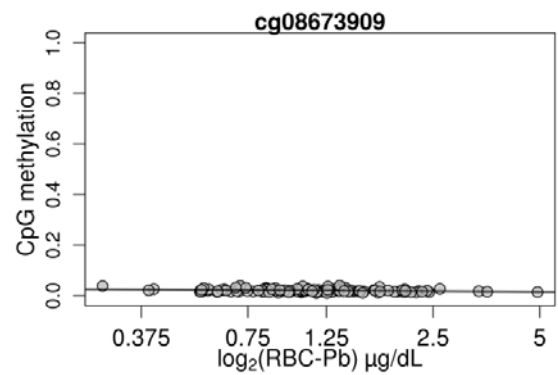

F

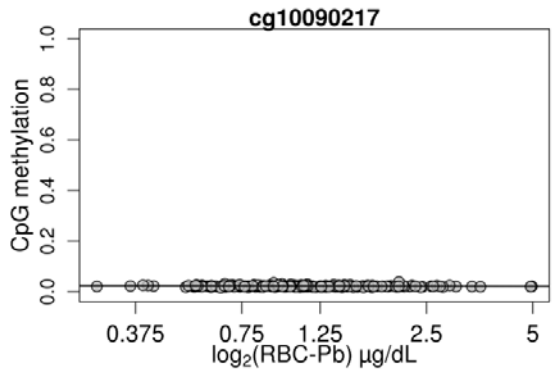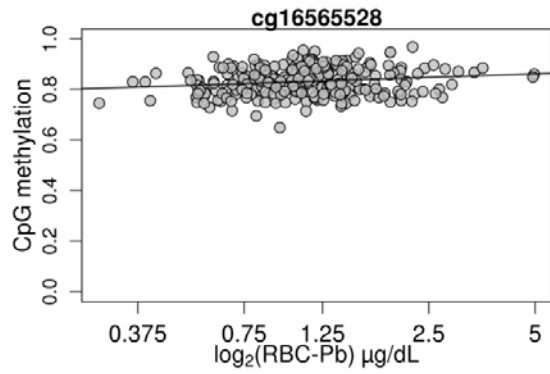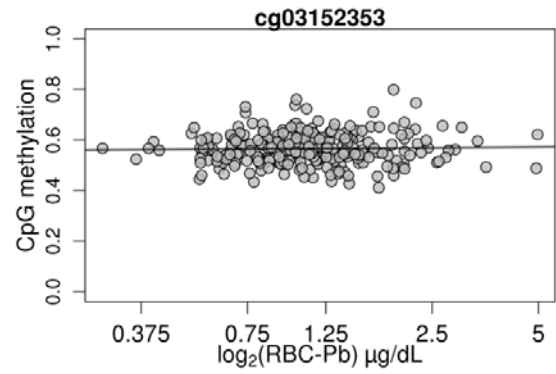

MF

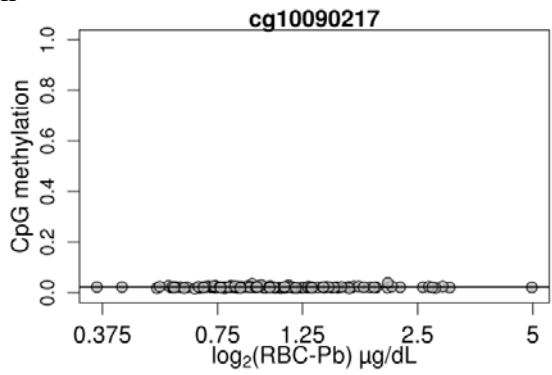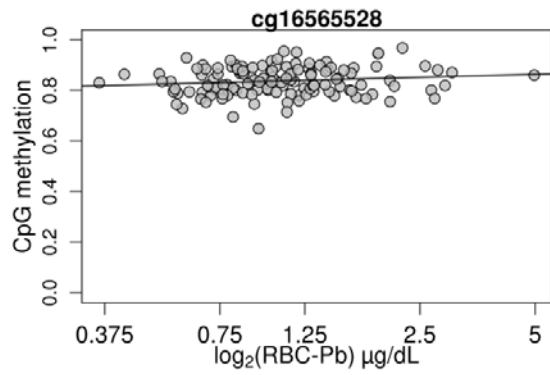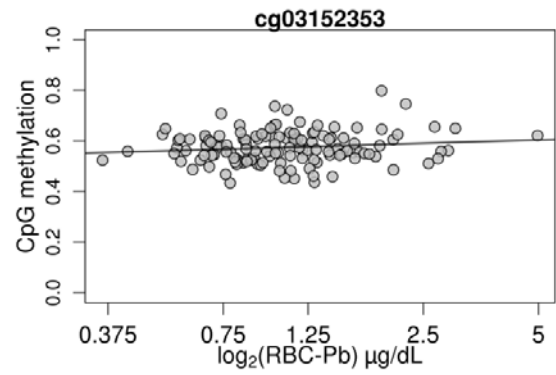

FF

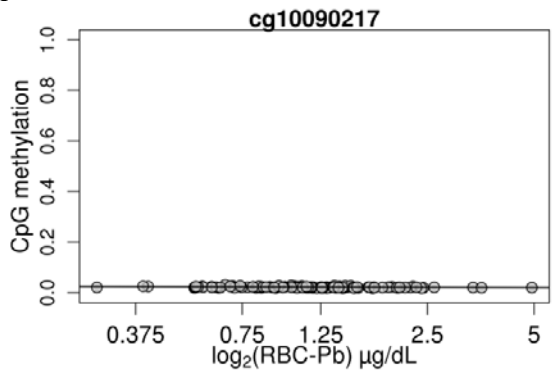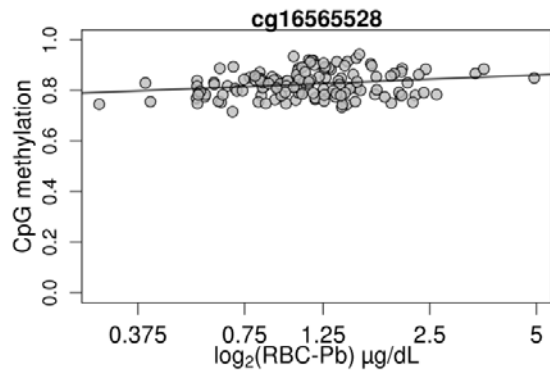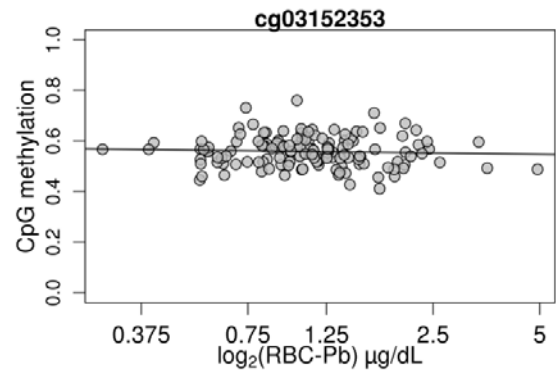

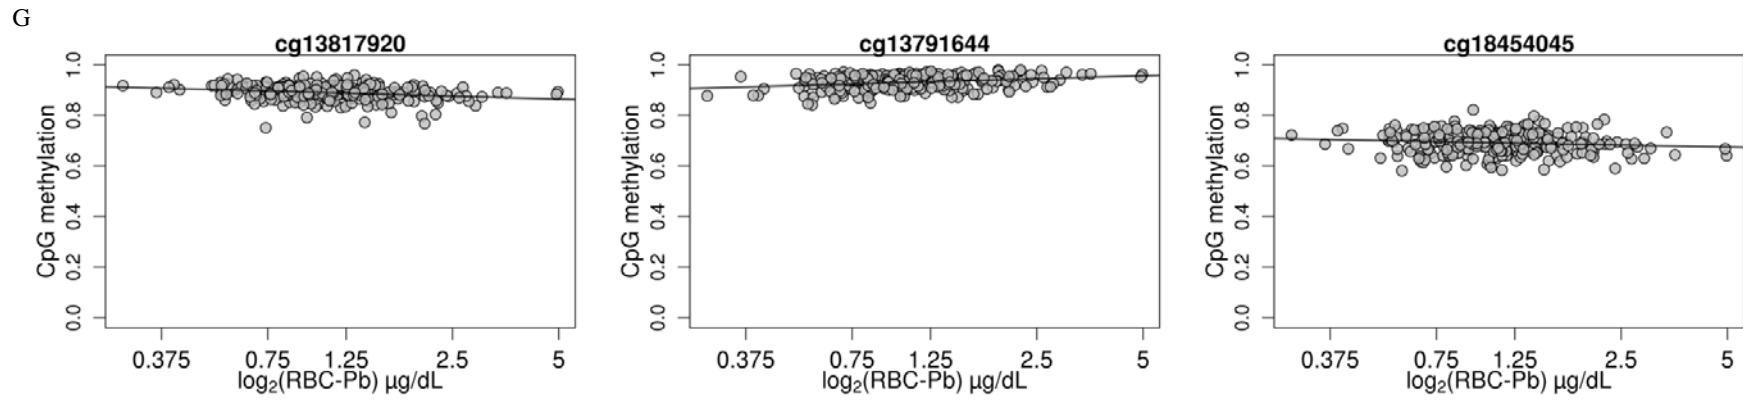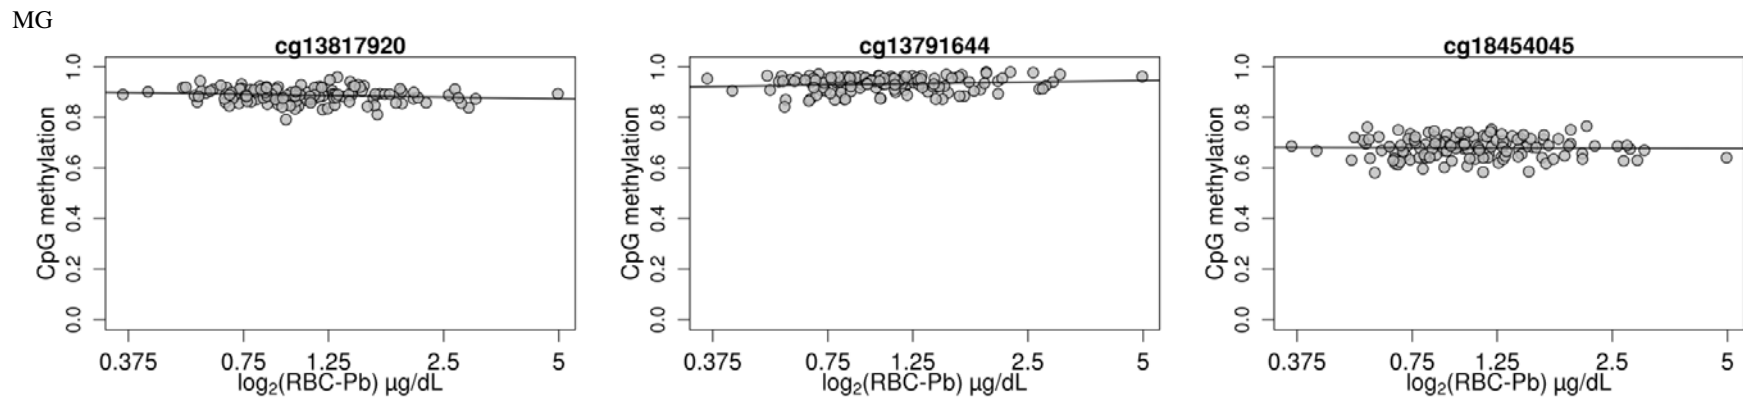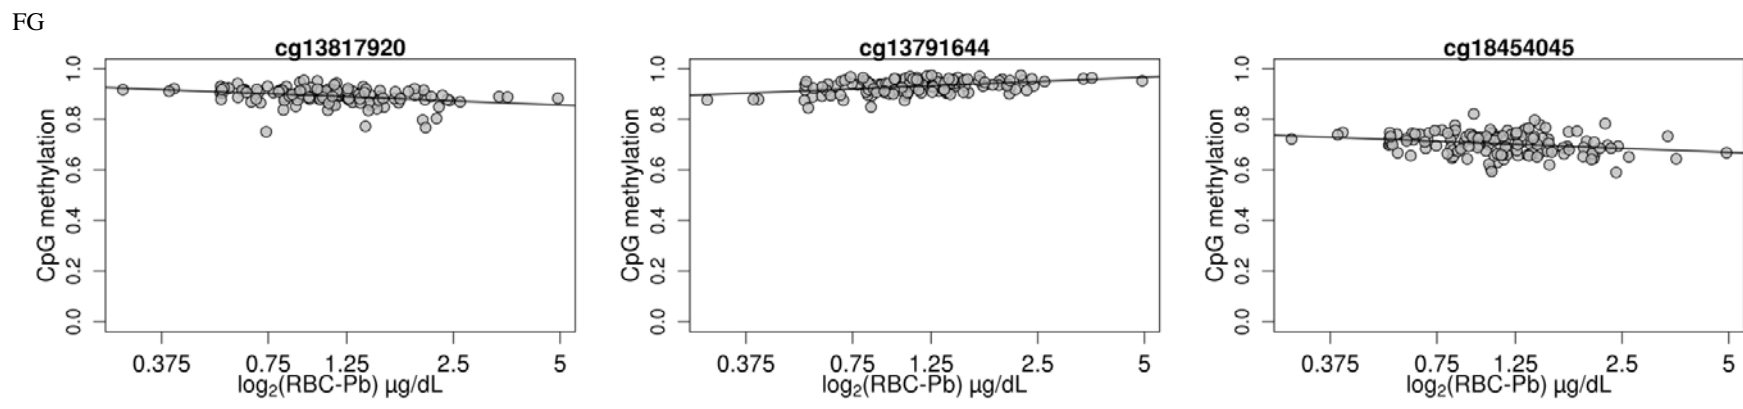

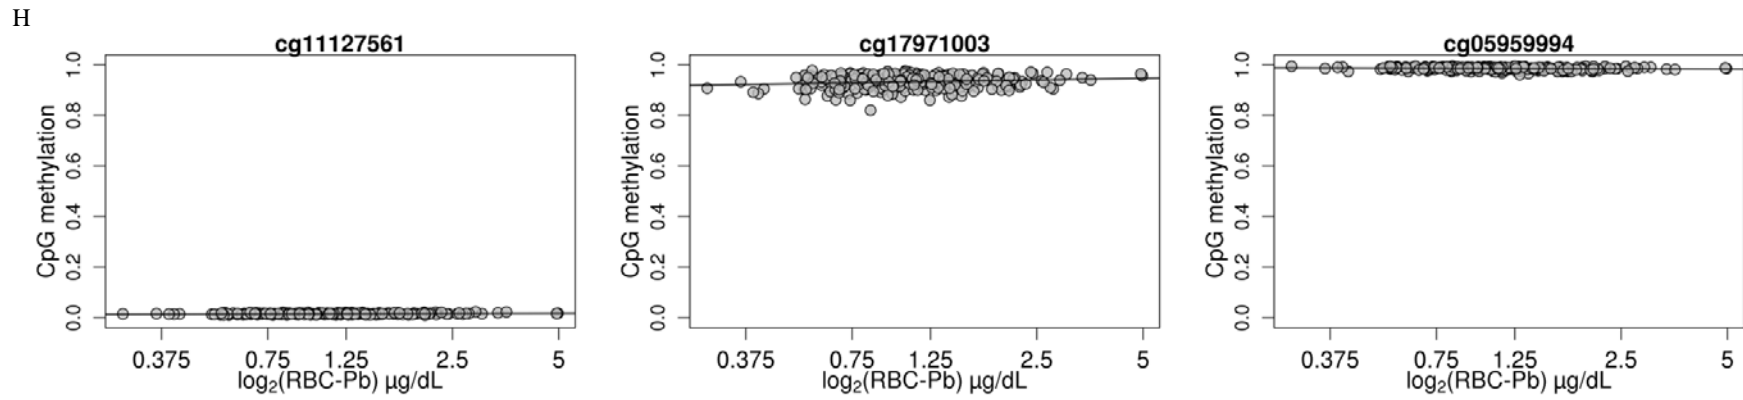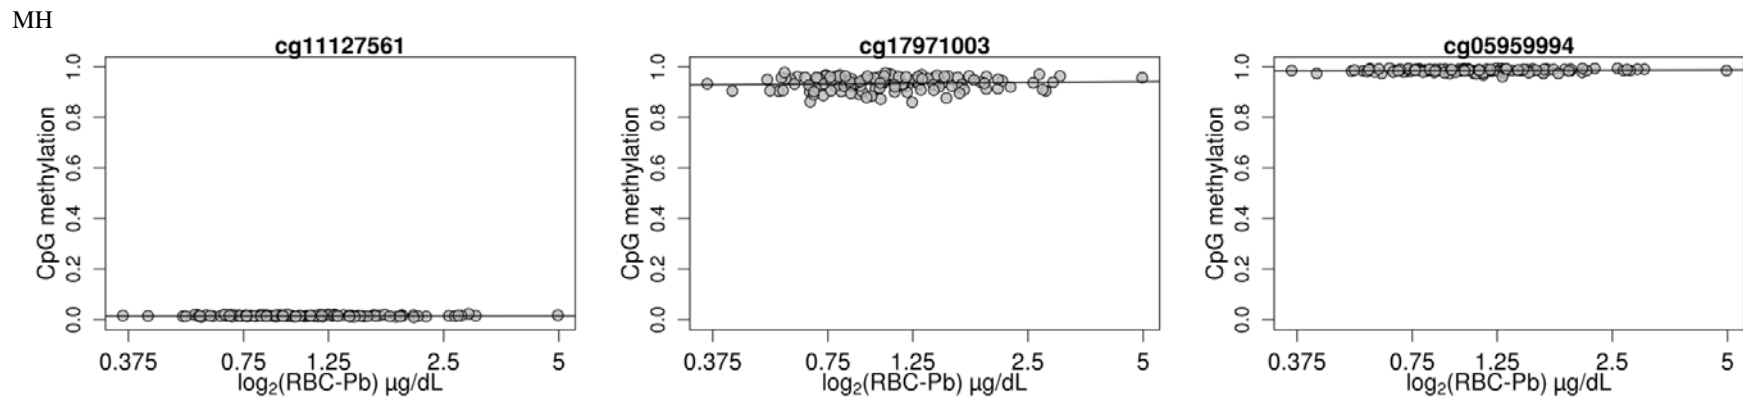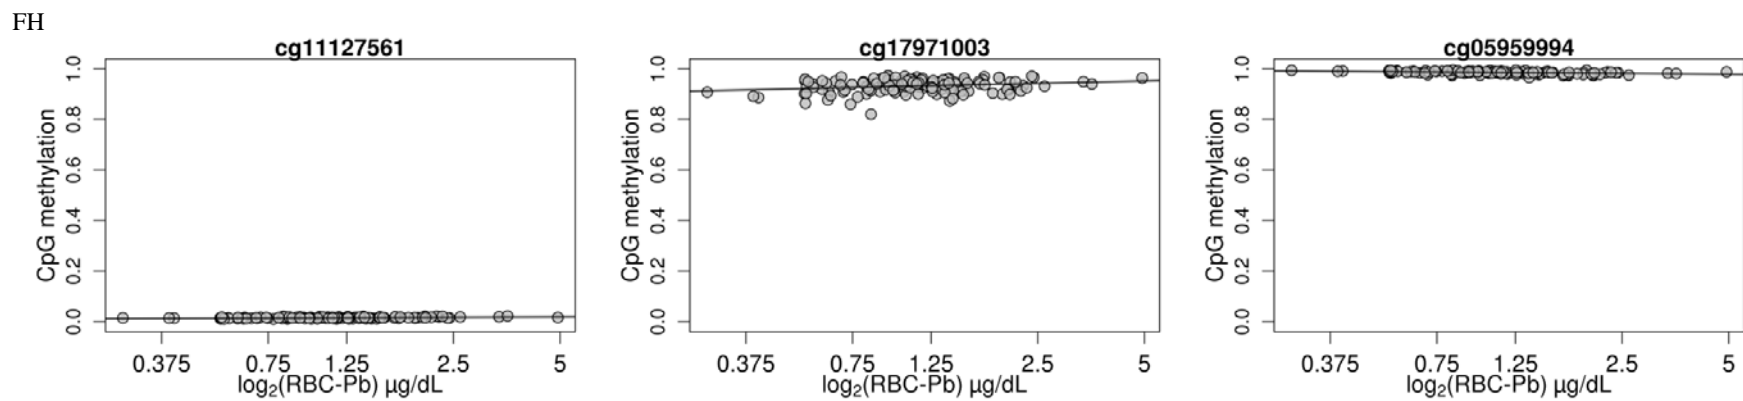

I

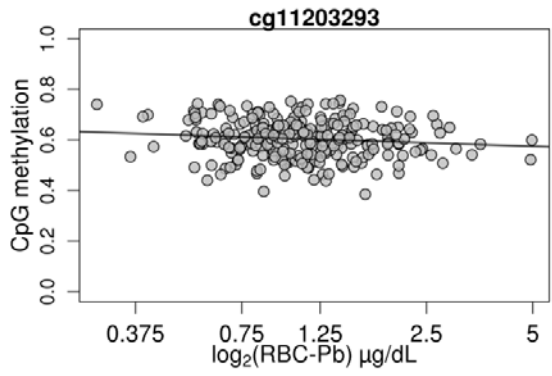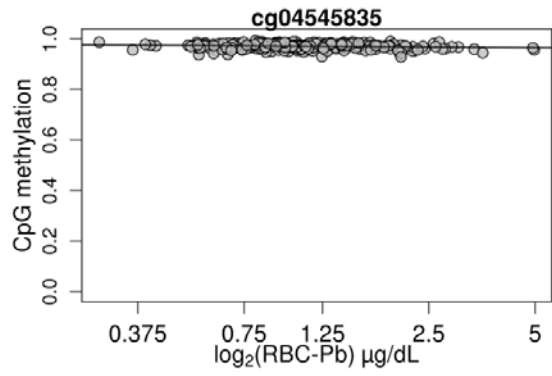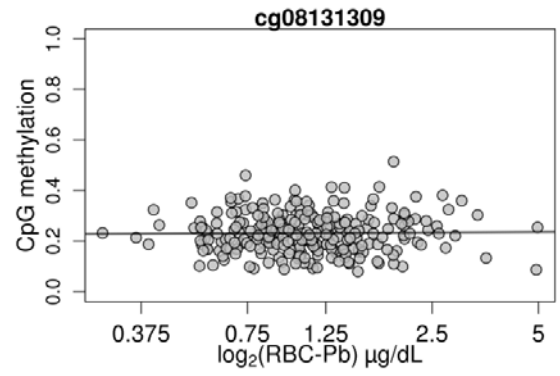

MI

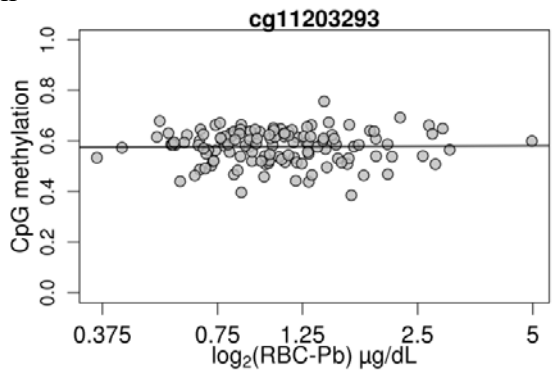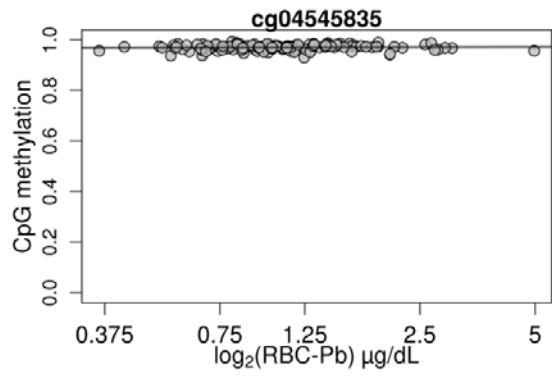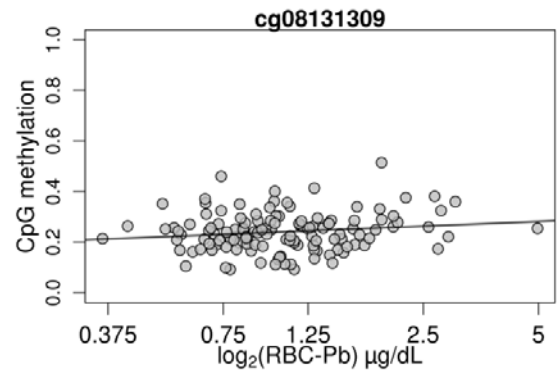

FI

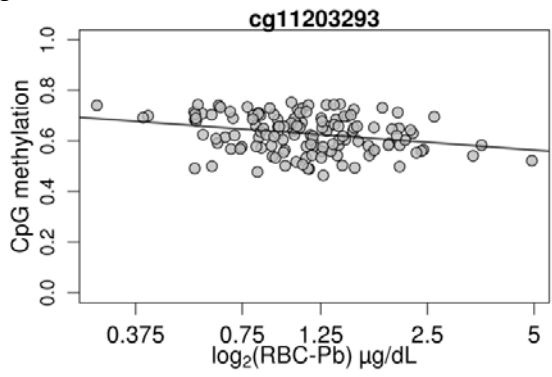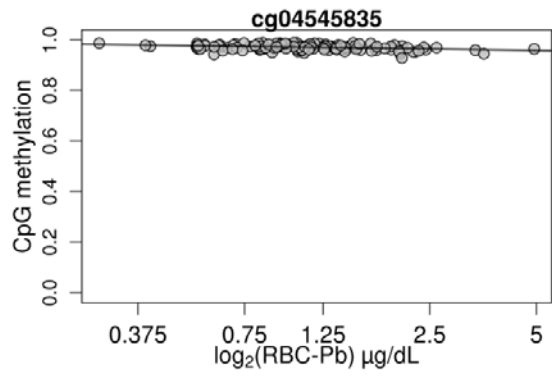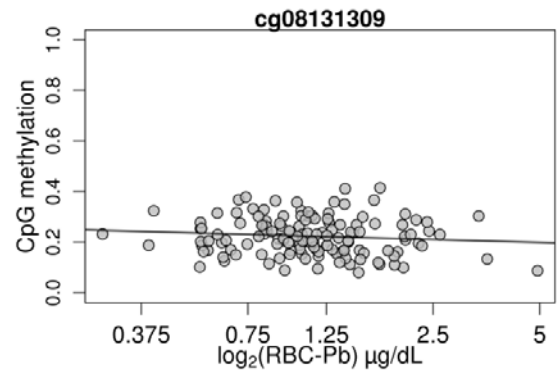

J

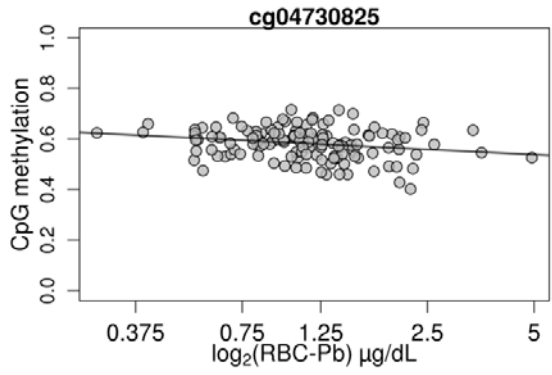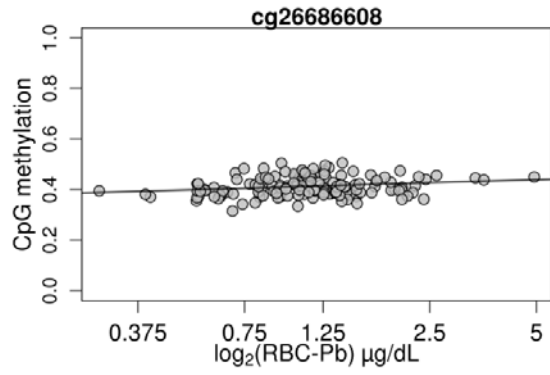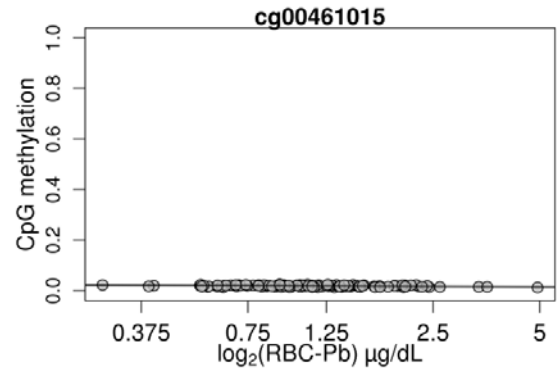

MJ

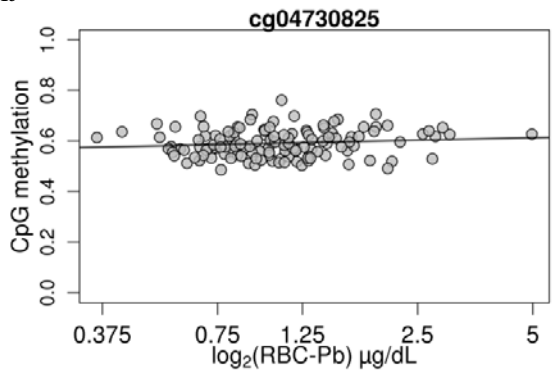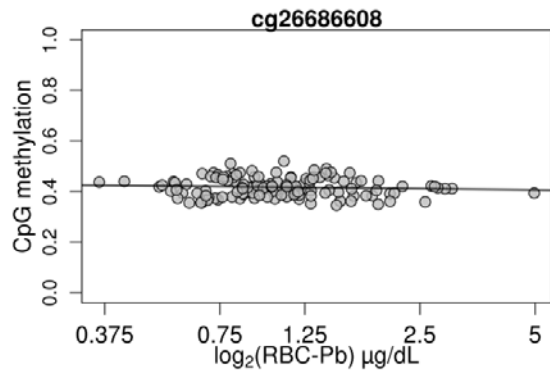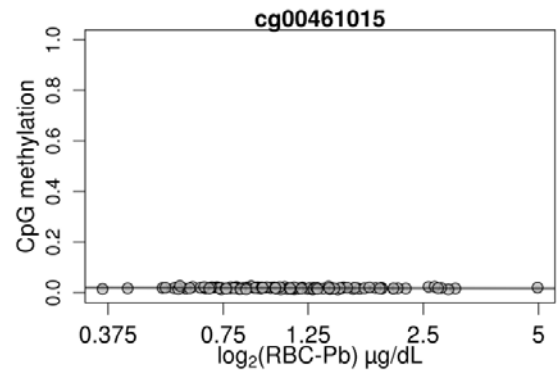

FJ

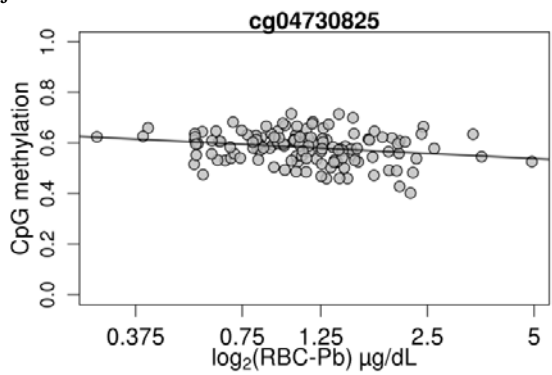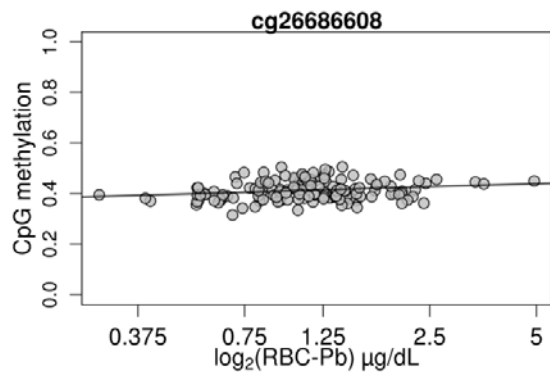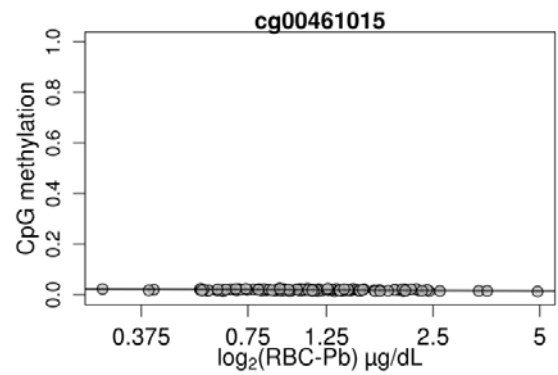

K

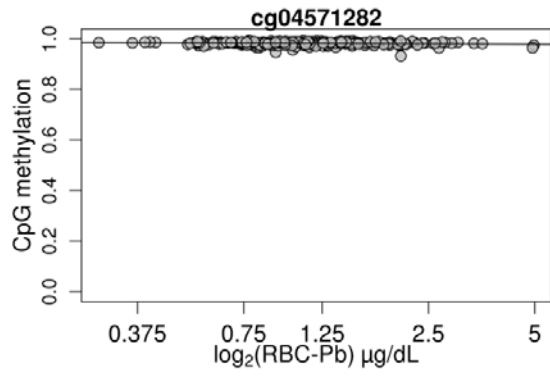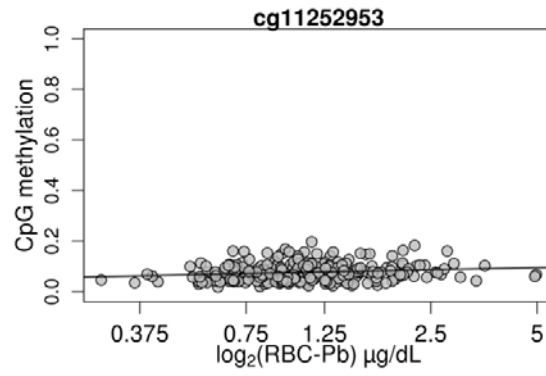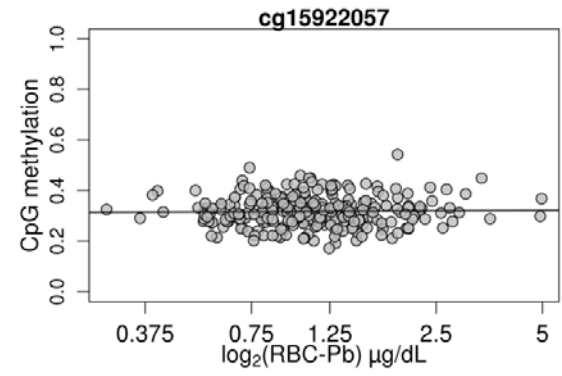

MK

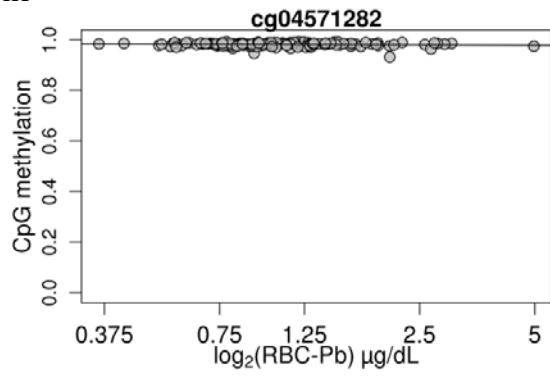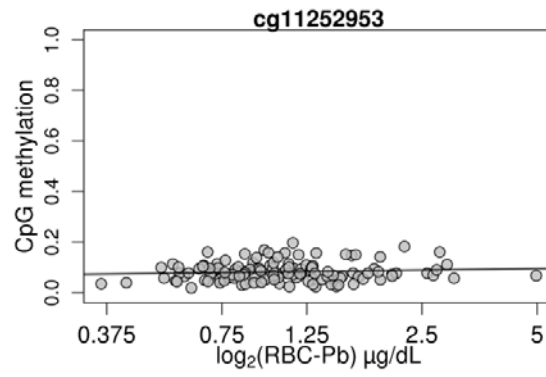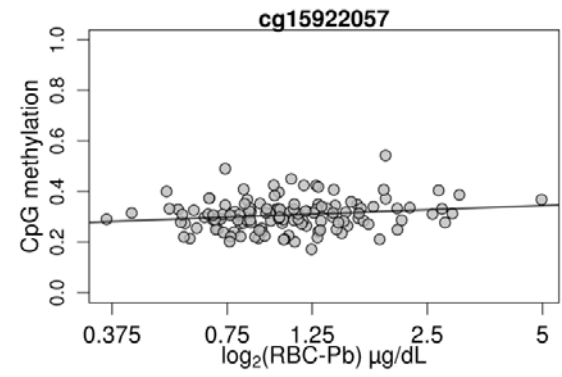

FK

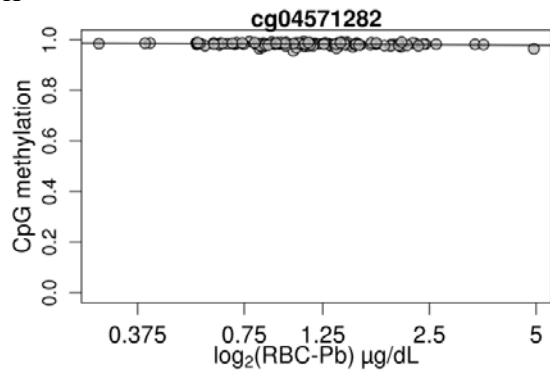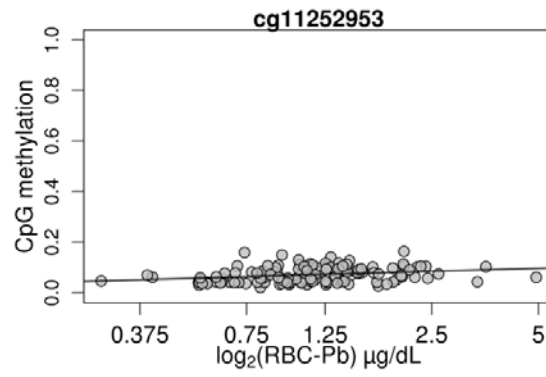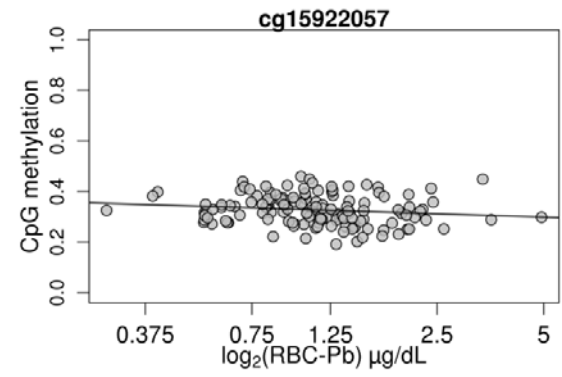



L

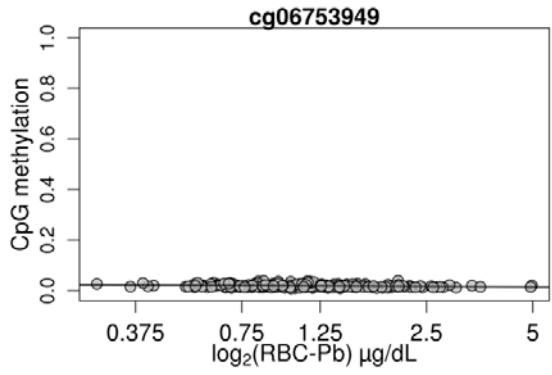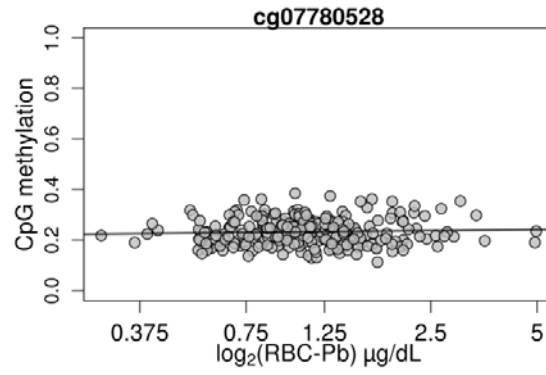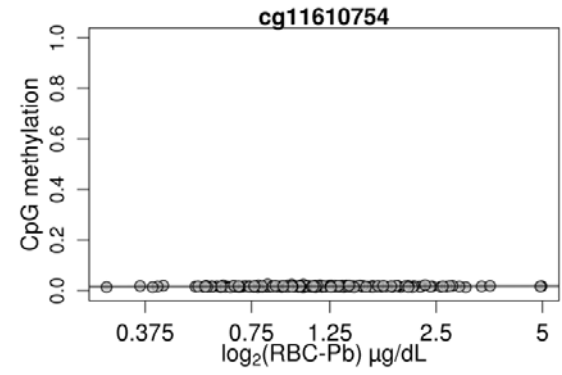

ML

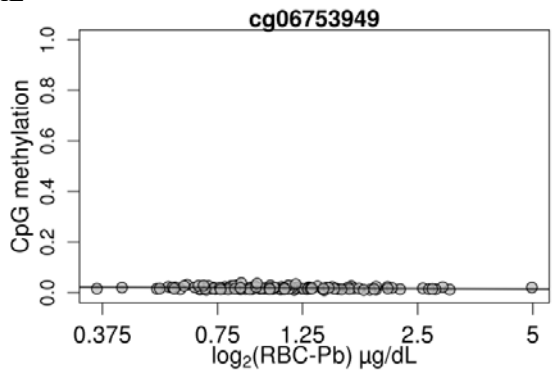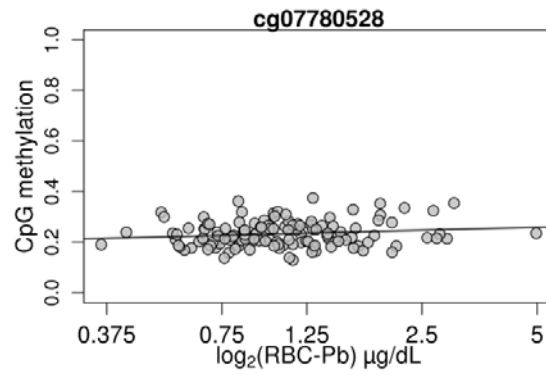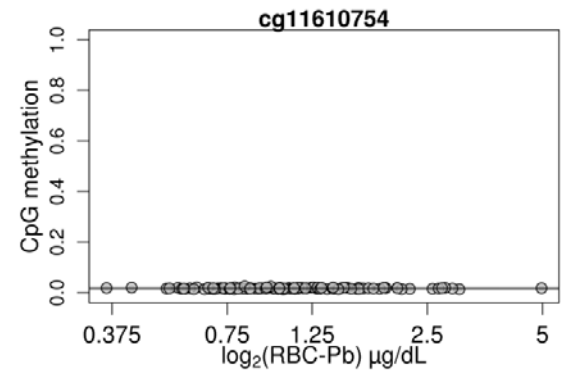

FL

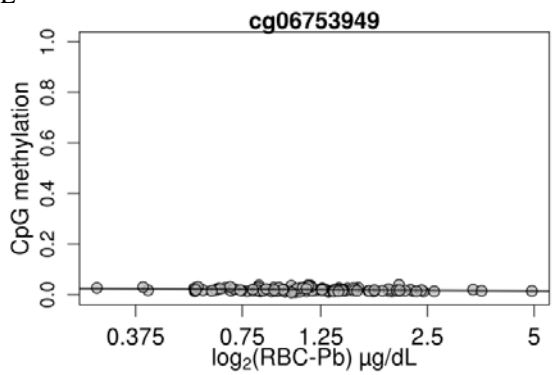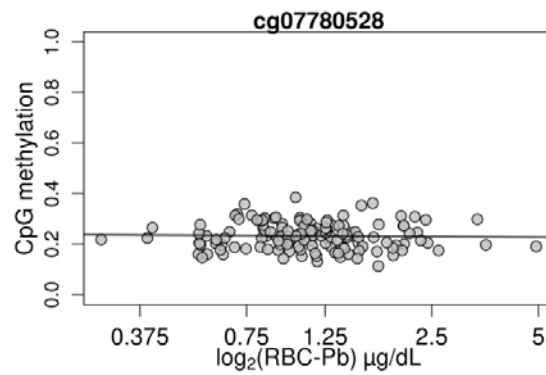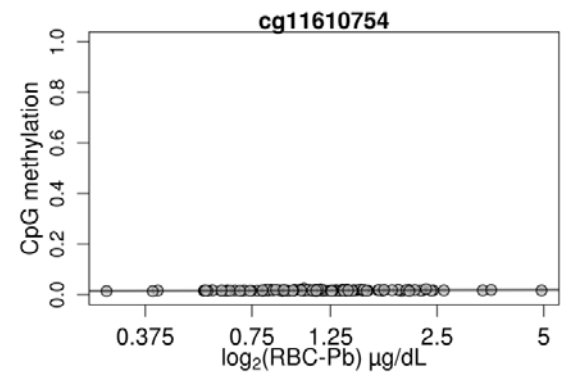

M

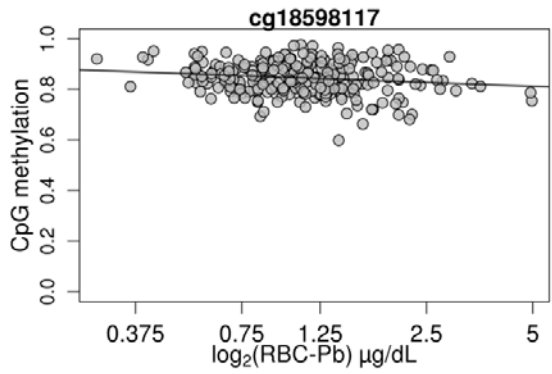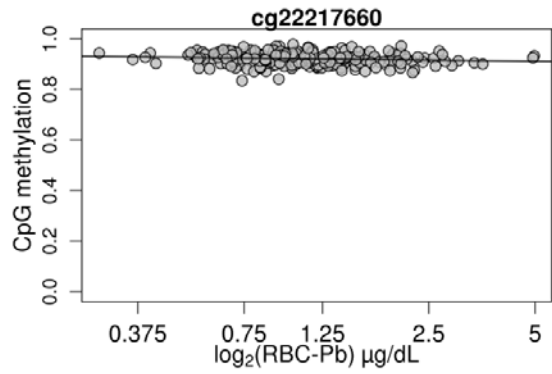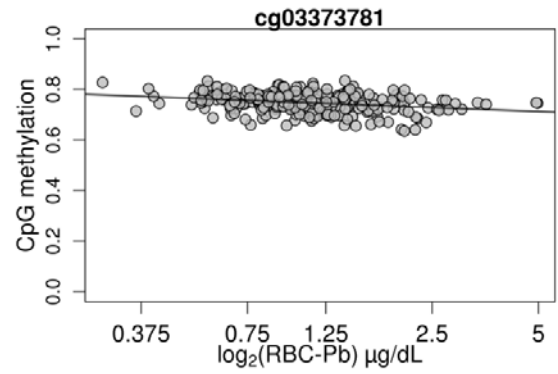

MM

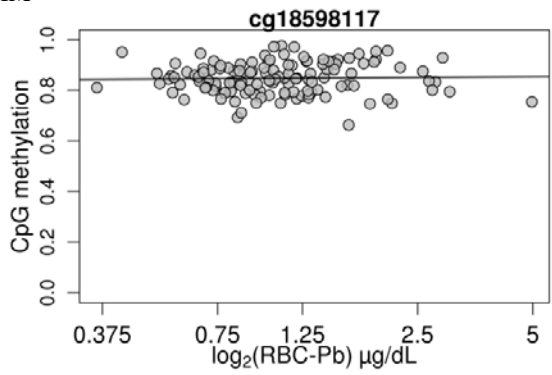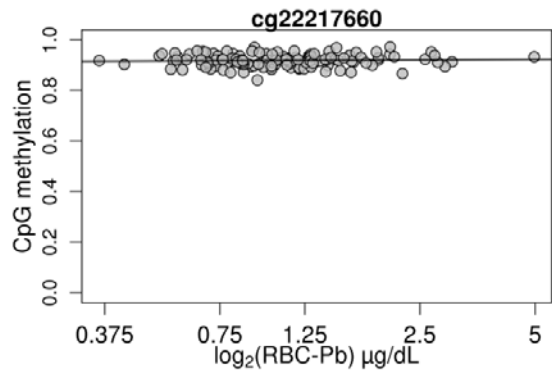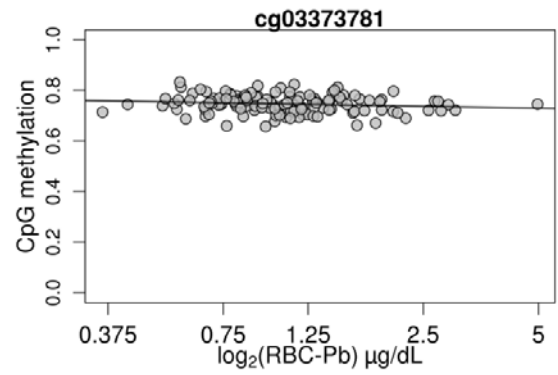

FM

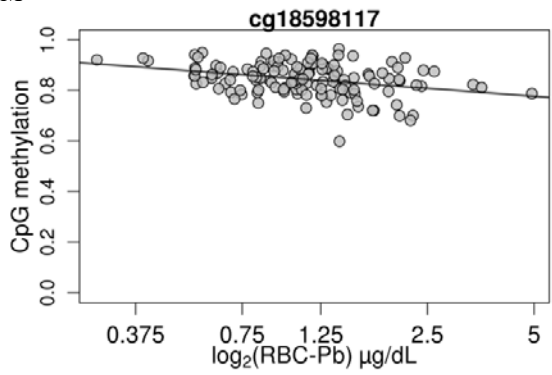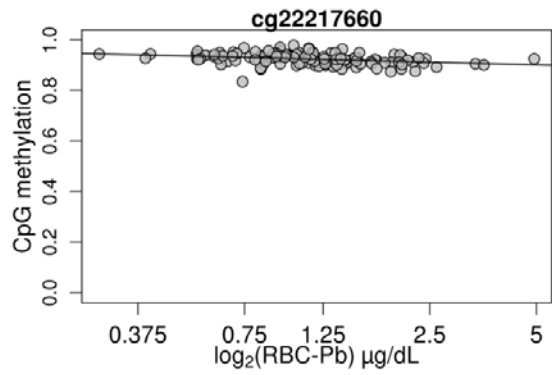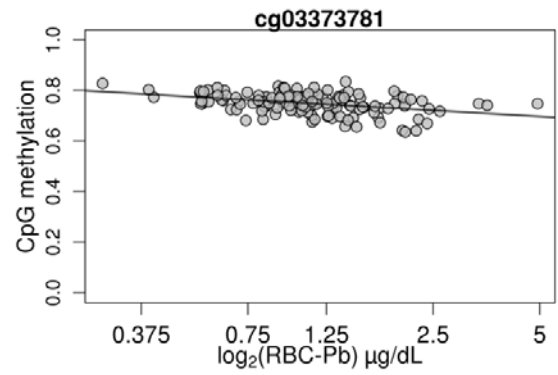

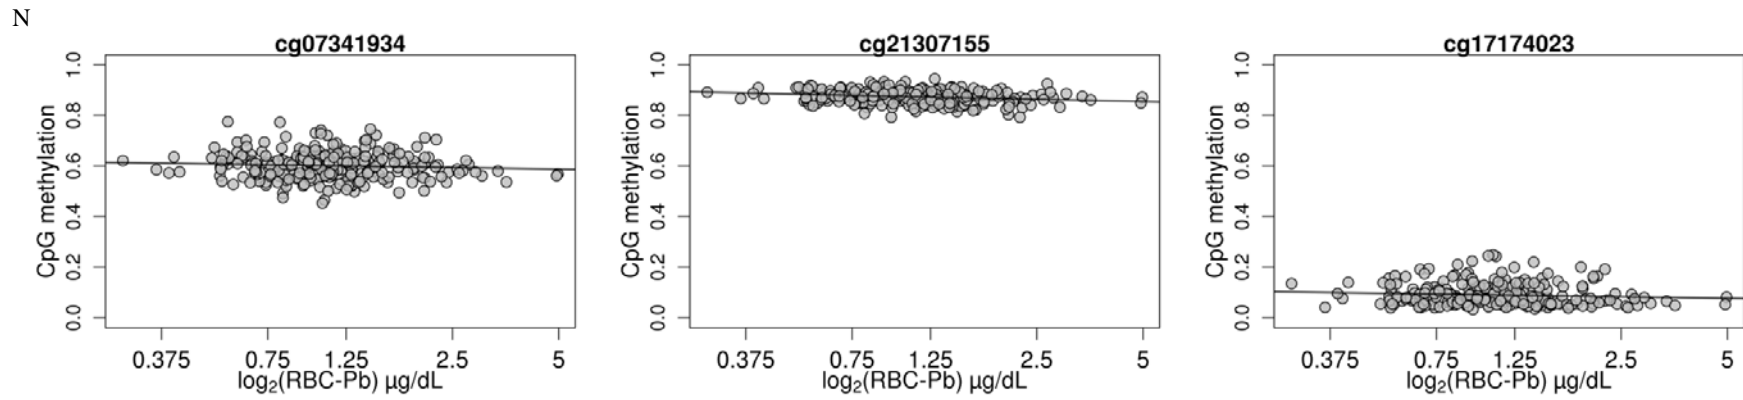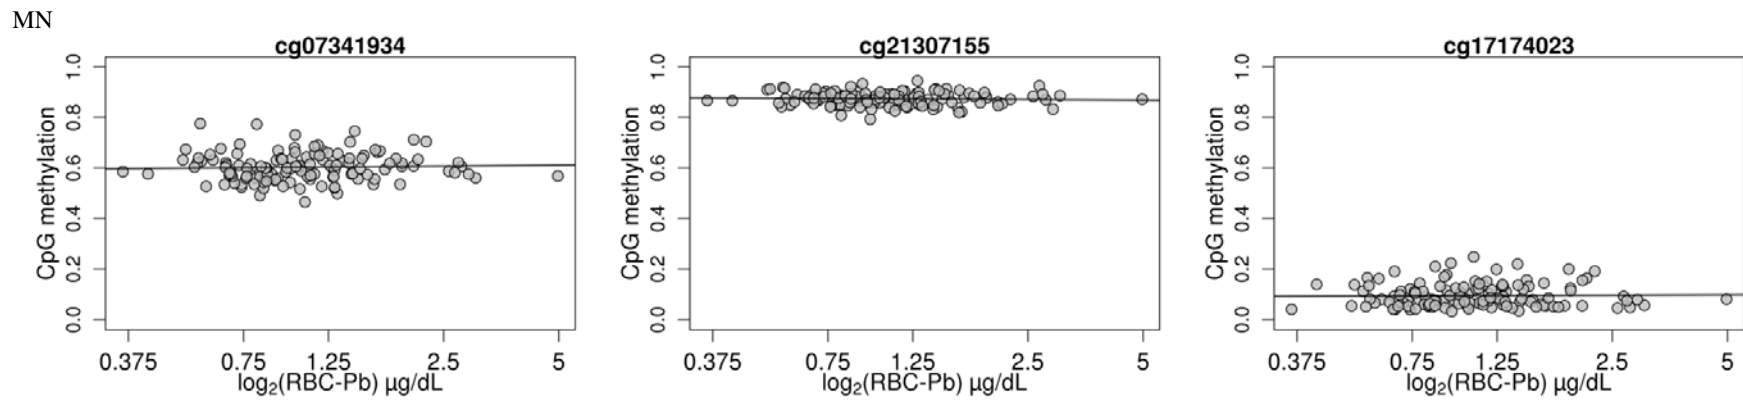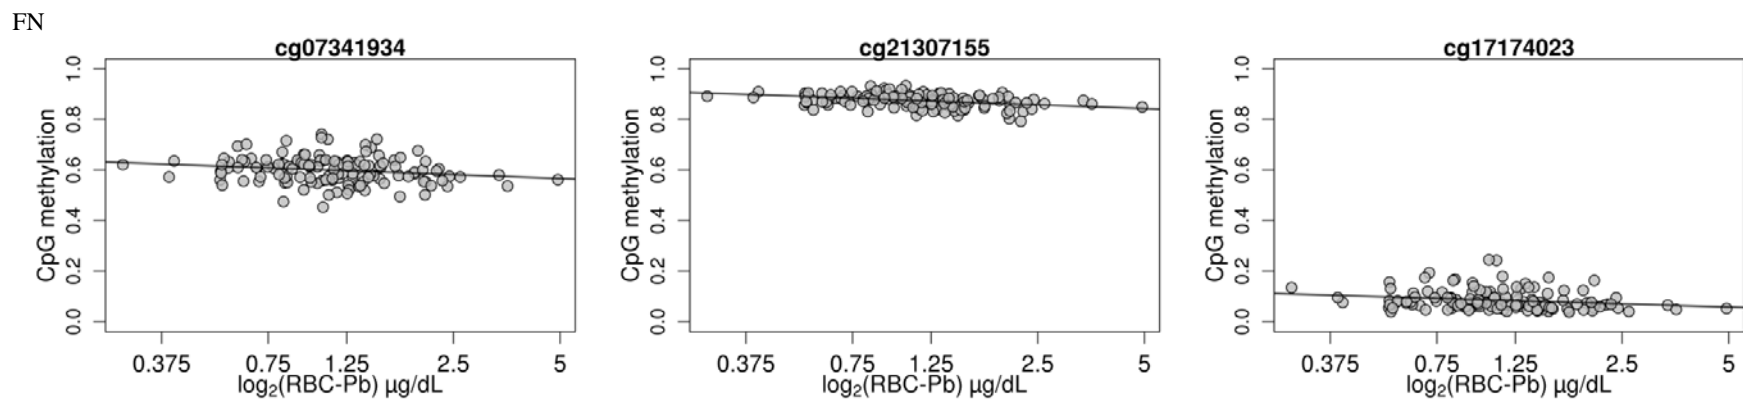

Supplement: EHP1246.s001.acco.pdf [file EHP1246.s001.acco.pdf]
